# Supplementary material for: A long-running in situ experiment in clay: 12 years of the Bitumen–Nitrate–Clay interaction experiment at Mont Terri rock laboratory
Source: Copernicus journal article supplement (doi:10.5194/sand-2-145-2023), 2023-09-06
Supplement: Supplementary file 1 [file sand-2-145-2023-supplement.pdf]

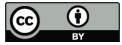

*Supplement of*

## **A long-running in situ experiment in clay: 12 years of the Bitumen–Nitrate–Clay interaction experiment at Mont Terri rock laboratory**

**Katrien Hendrix et al.**

*Correspondence to:* Katrien Hendrix ([katrien.hendrix@sckcen.be](mailto:katrien.hendrix@sckcen.be))

The copyright of individual parts of the supplement might differ from the article licence.



# A long running in-situ experiment in clay: 12 years of the Bitumen-Nitrate-Clay interaction experiment at Mont Terri rock laboratory in Switzerland

Katrien Hendrix, Nele Bleyen, Kristel Mijndonckx, Veerle Van Gompel, Achim Albrecht, Yannick Linard, Pierre De Cannière, Maryna Surkova, Charles Wittebroodt, Joe Small, Torben Weyand, Michael Jendras and Elie Valcke

SafeND 2023

Berlin – 14/09/2023

# BN: Bitumen-Nitrate-Clay interaction experiment one of the 28 most important and longest-running experiments at Mont Terri rock laboratory

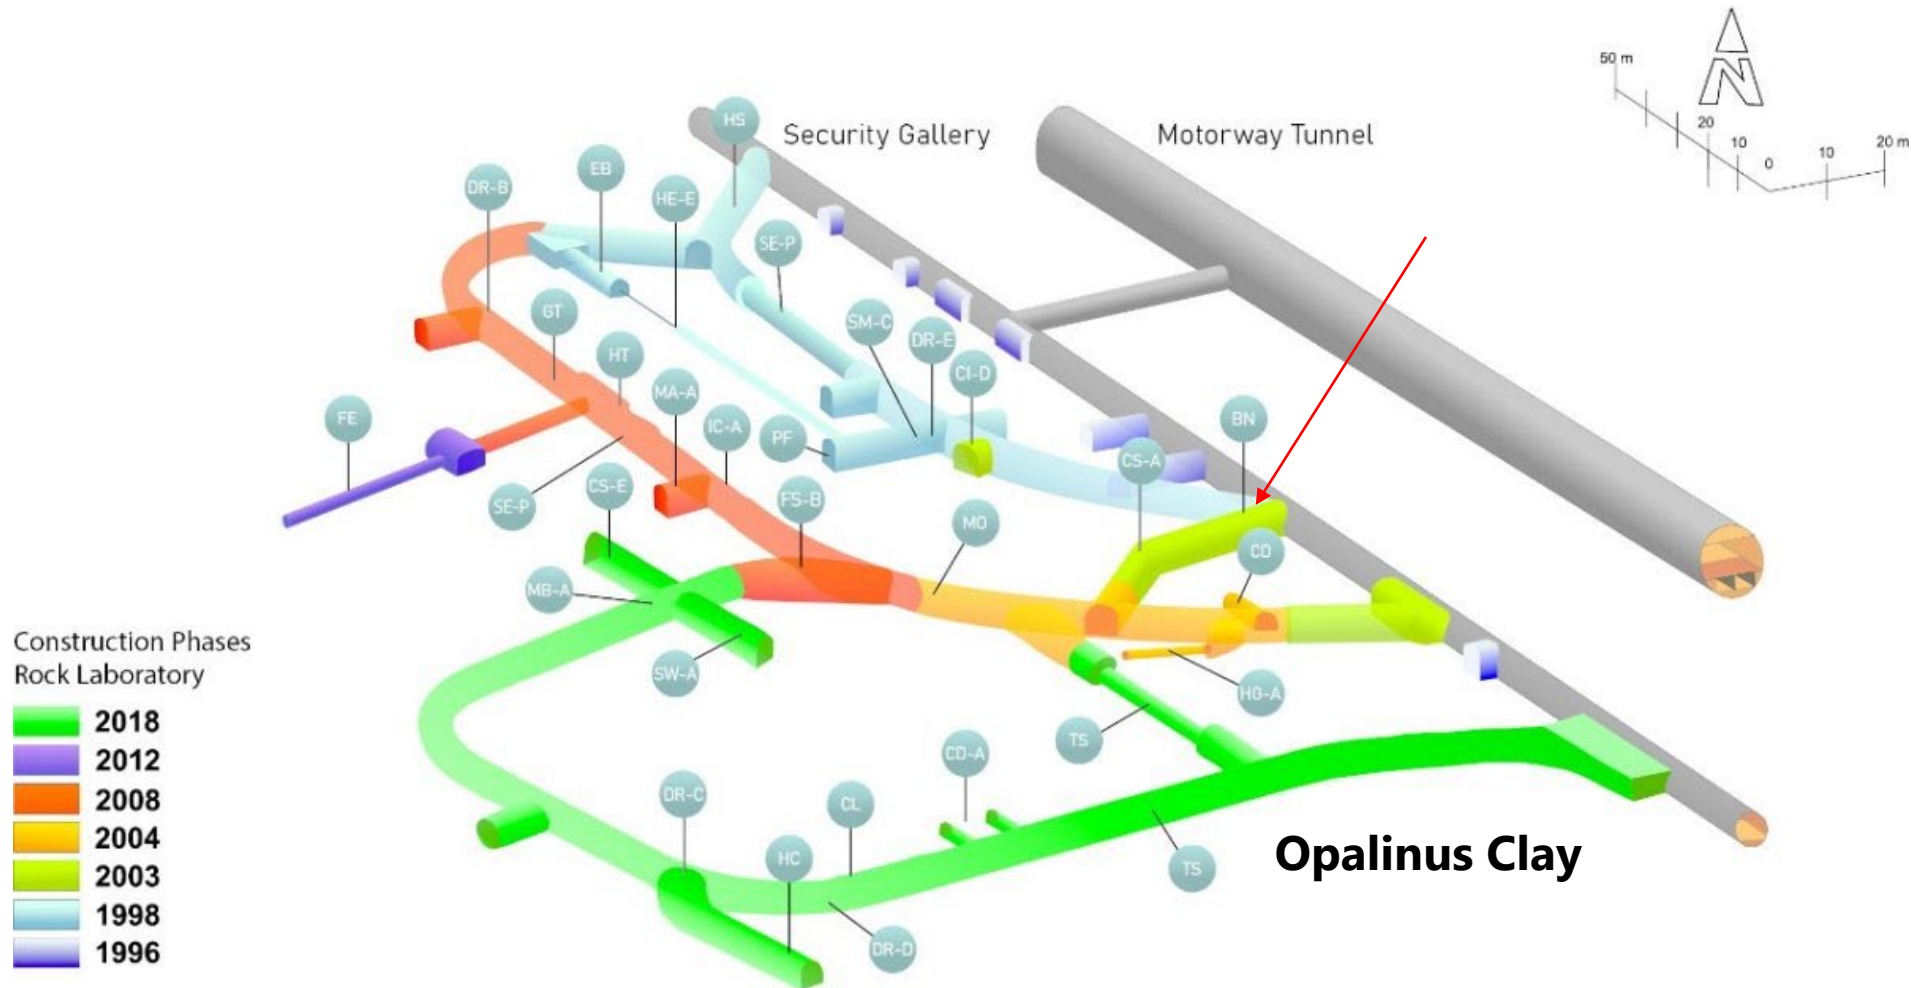

# Nitrate plume from bituminized waste => possible perturbations in the near field

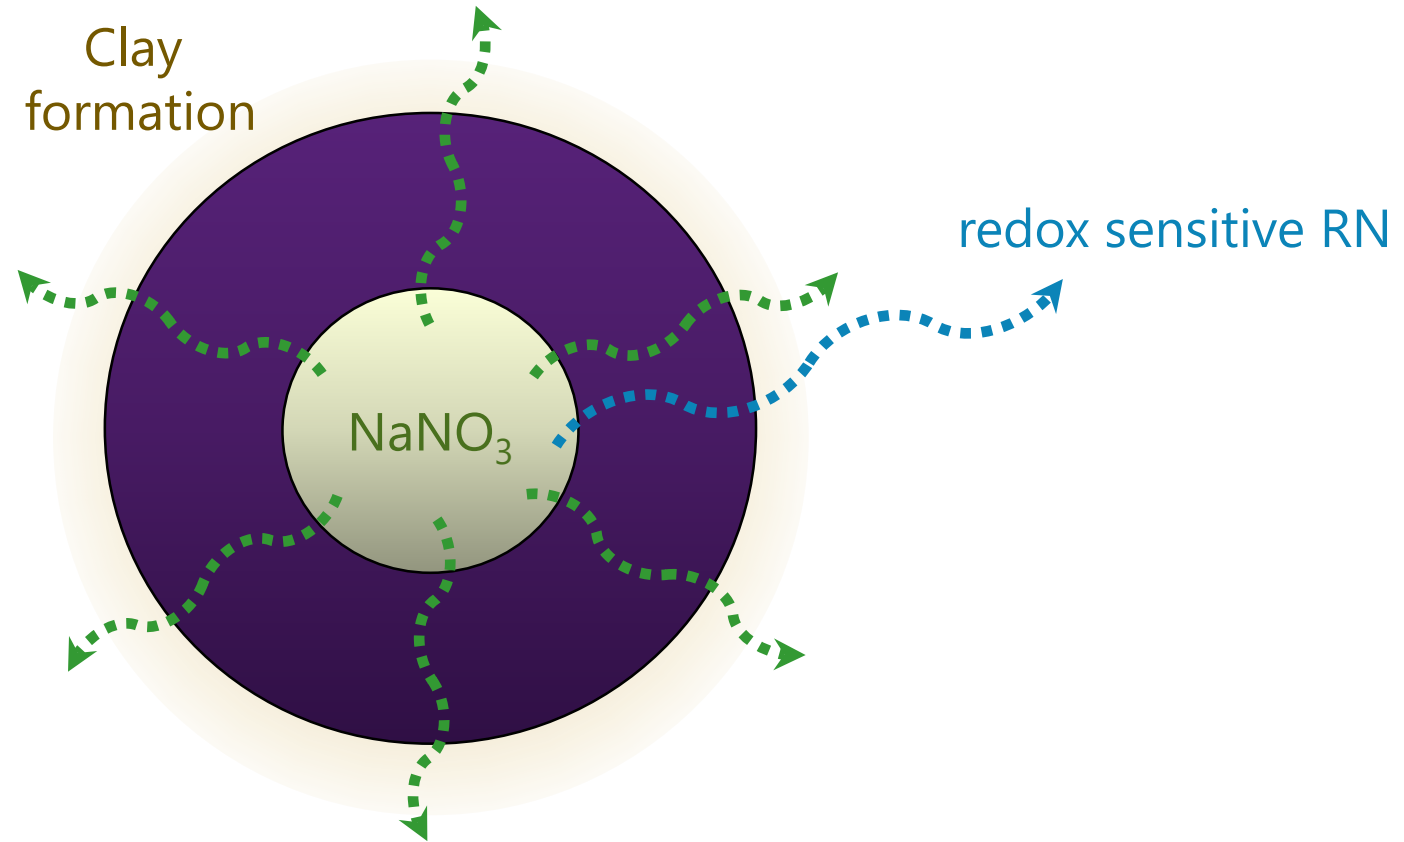

# Nitrate perturbations studied in BN

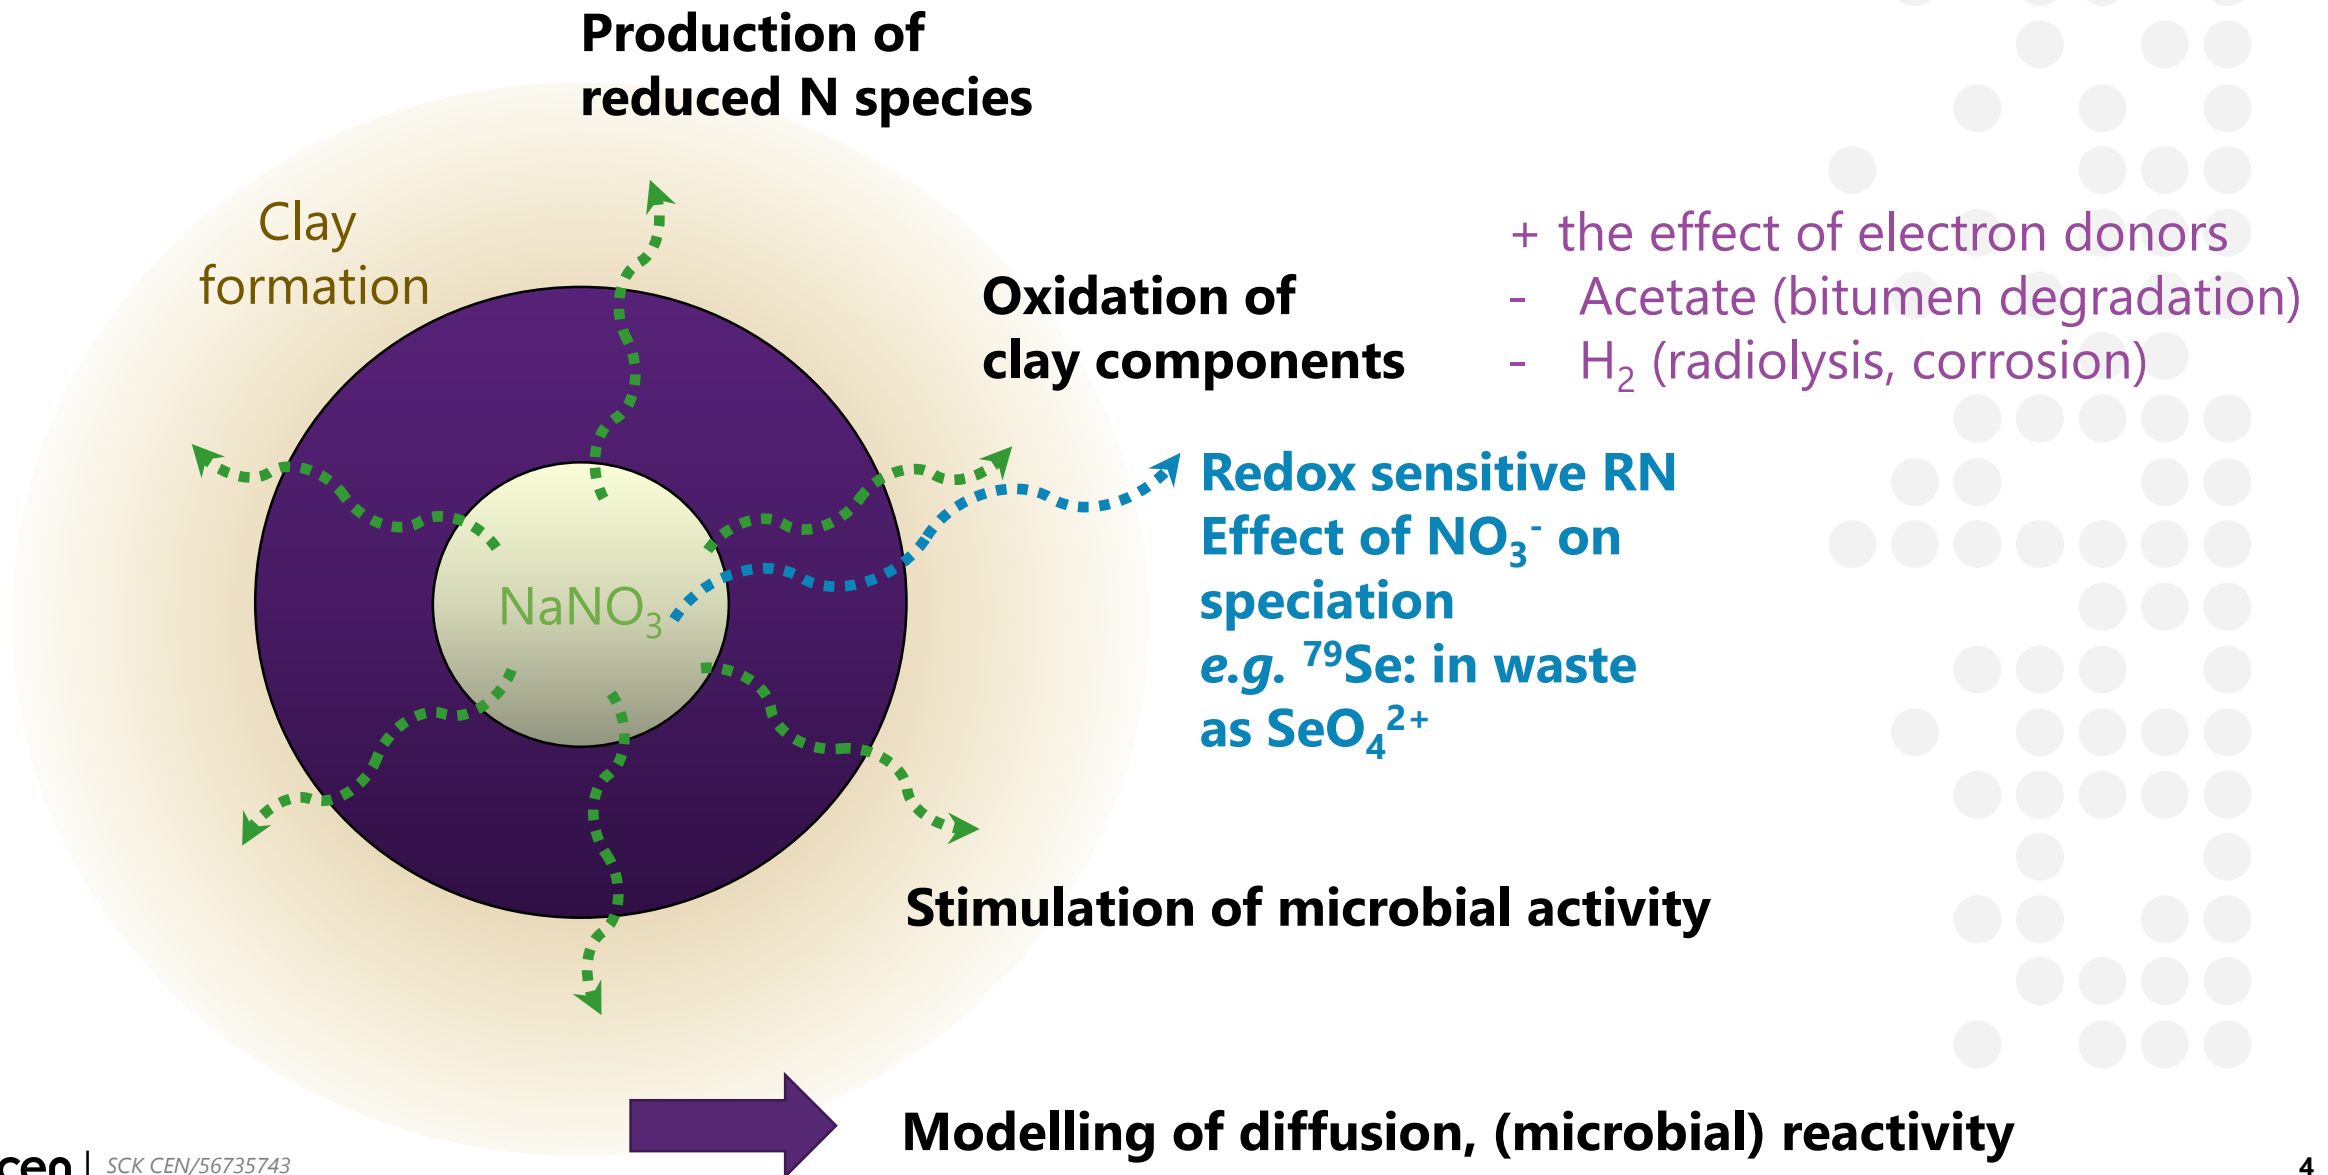

# Experimental setup of BN experiment

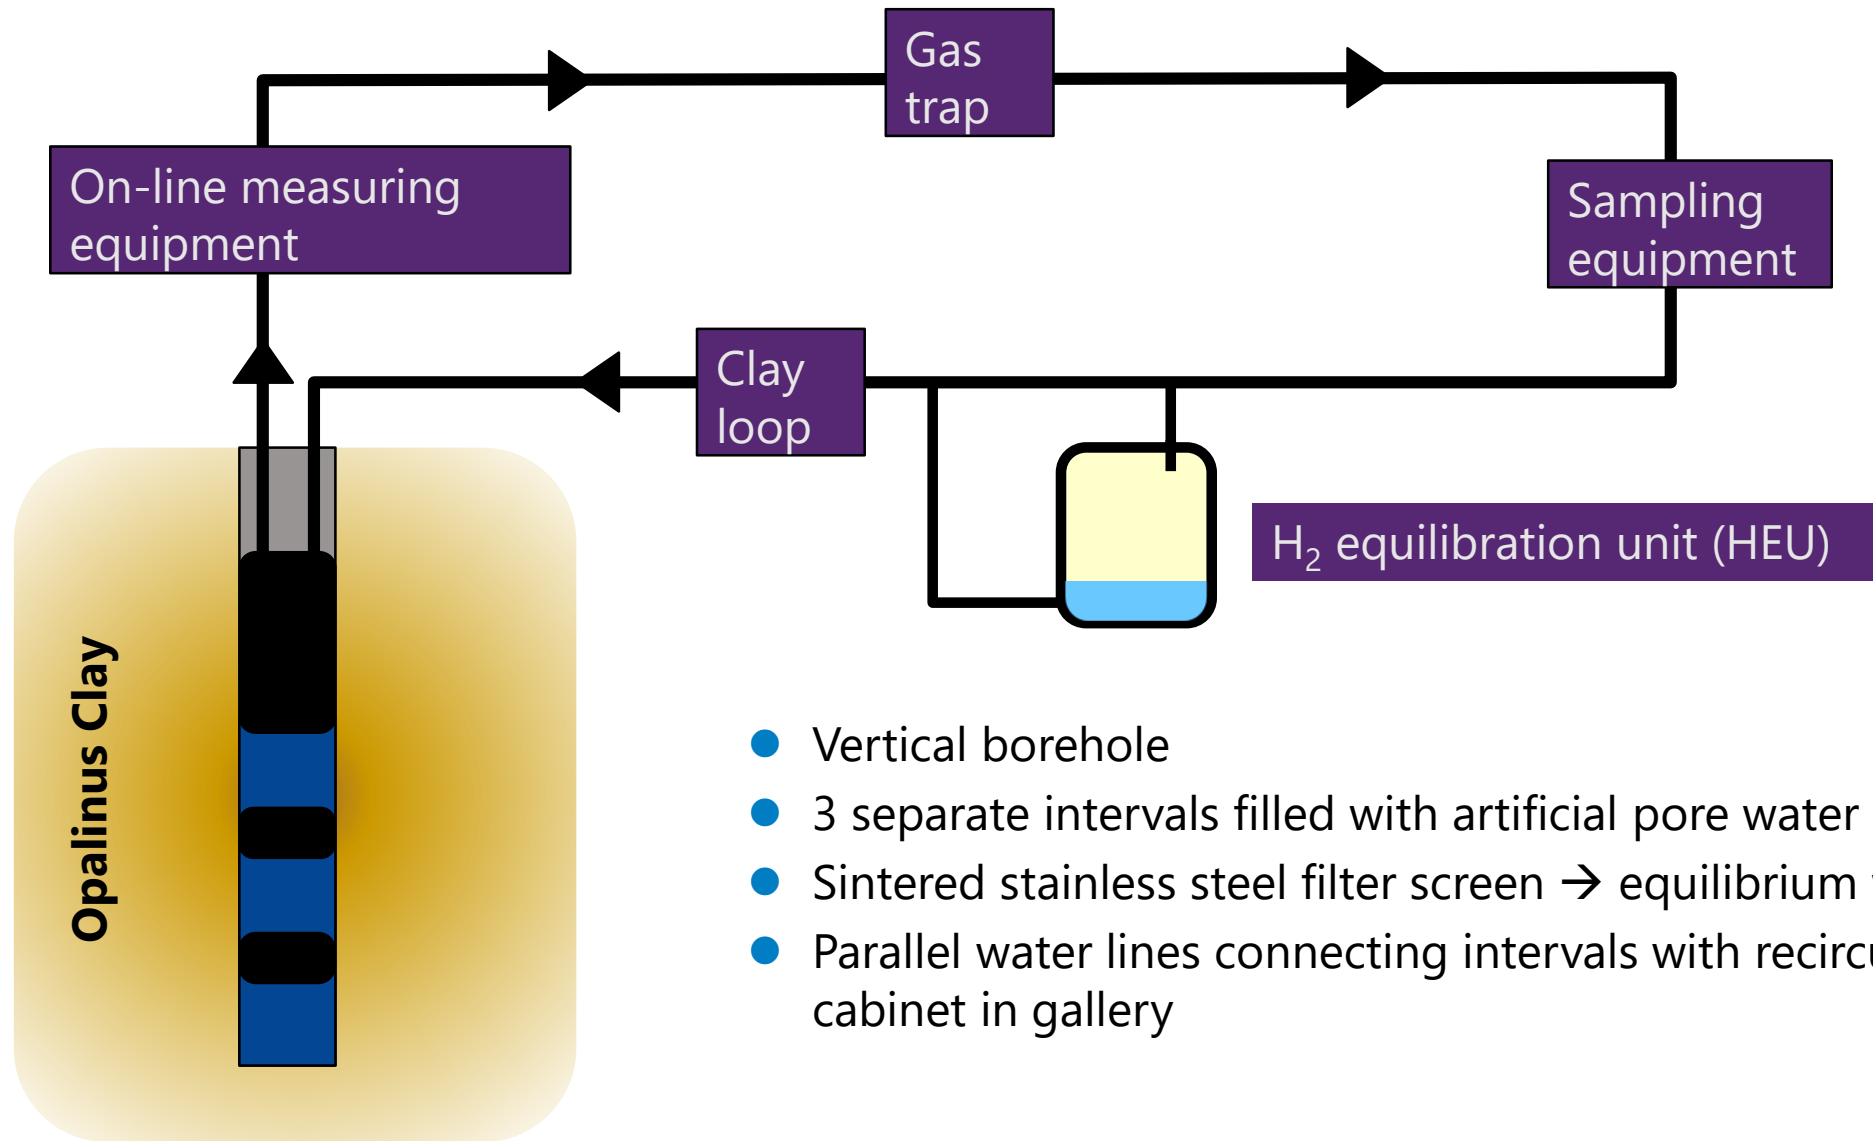

- Vertical borehole
- 3 separate intervals filled with artificial pore water (APW)
- Sintered stainless steel filter screen → equilibrium with clay
- Parallel water lines connecting intervals with recirculation cabinet in gallery

# Experimental setup of BN experiment

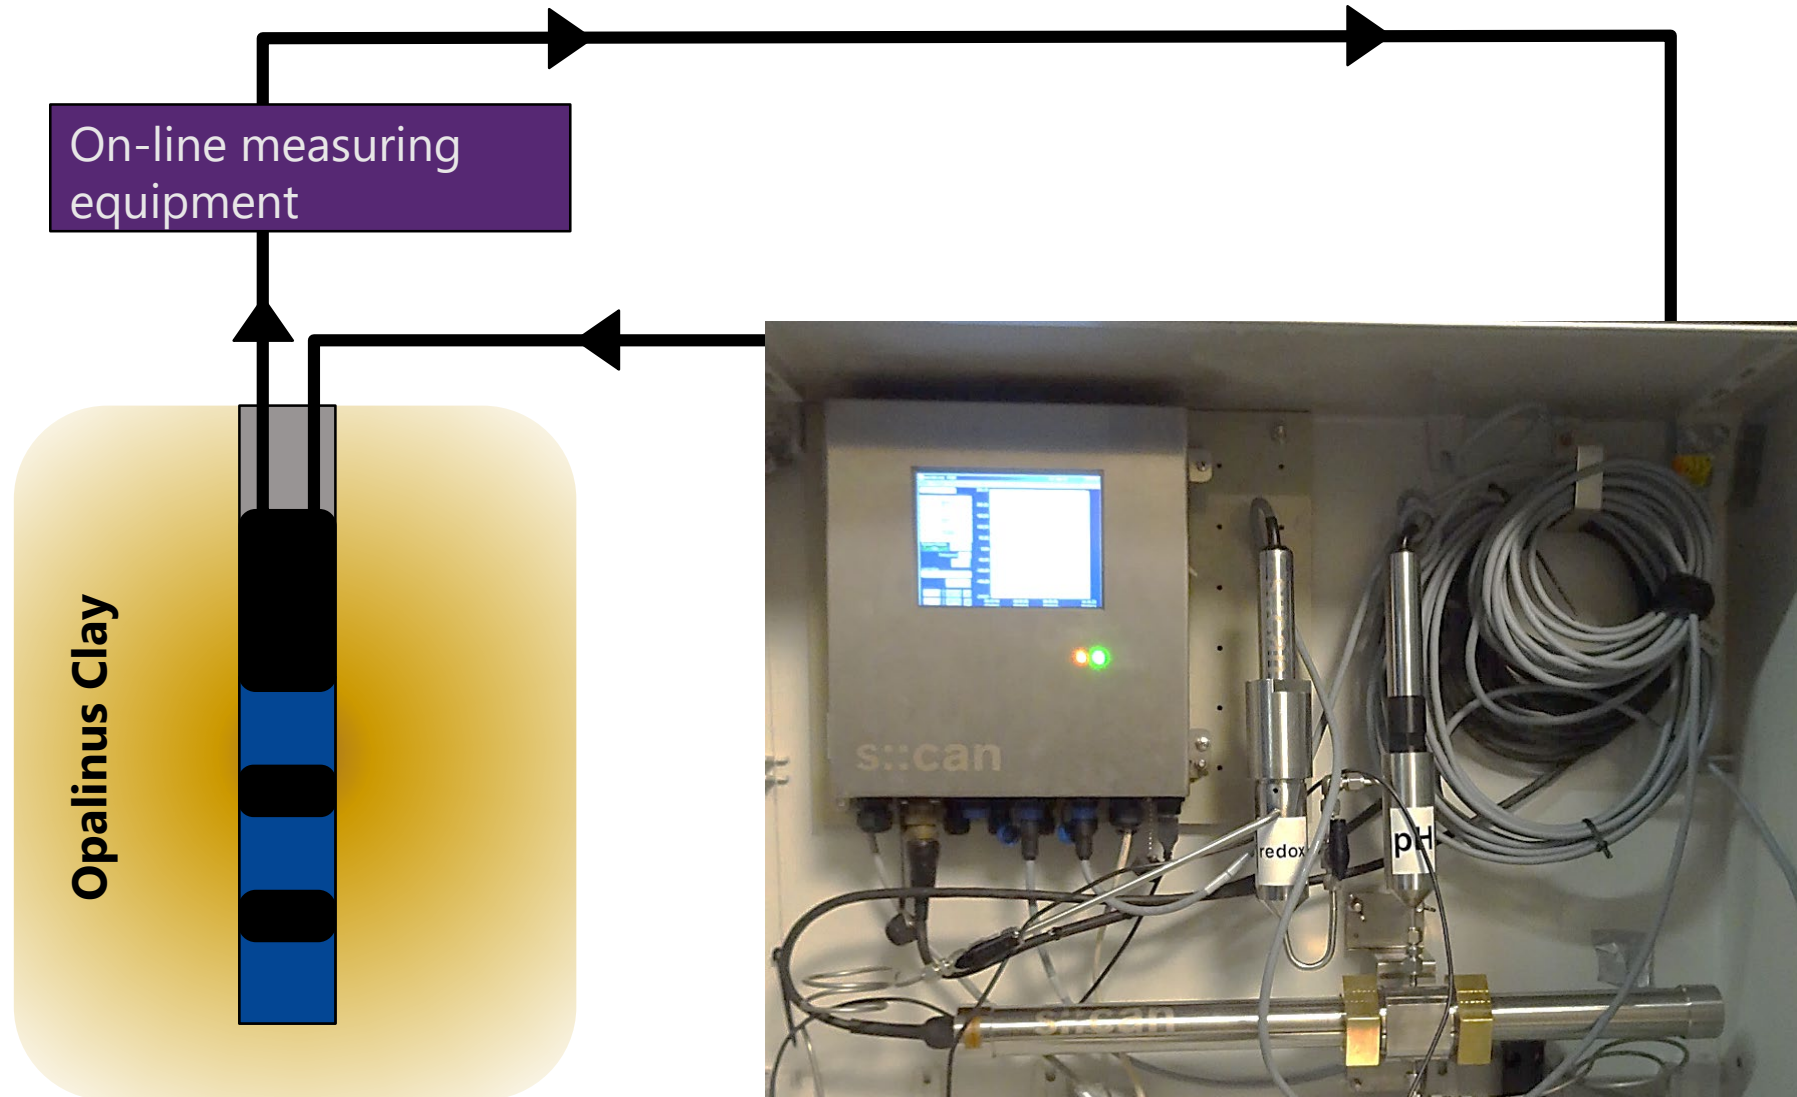



# Experimental setup of BN experiment

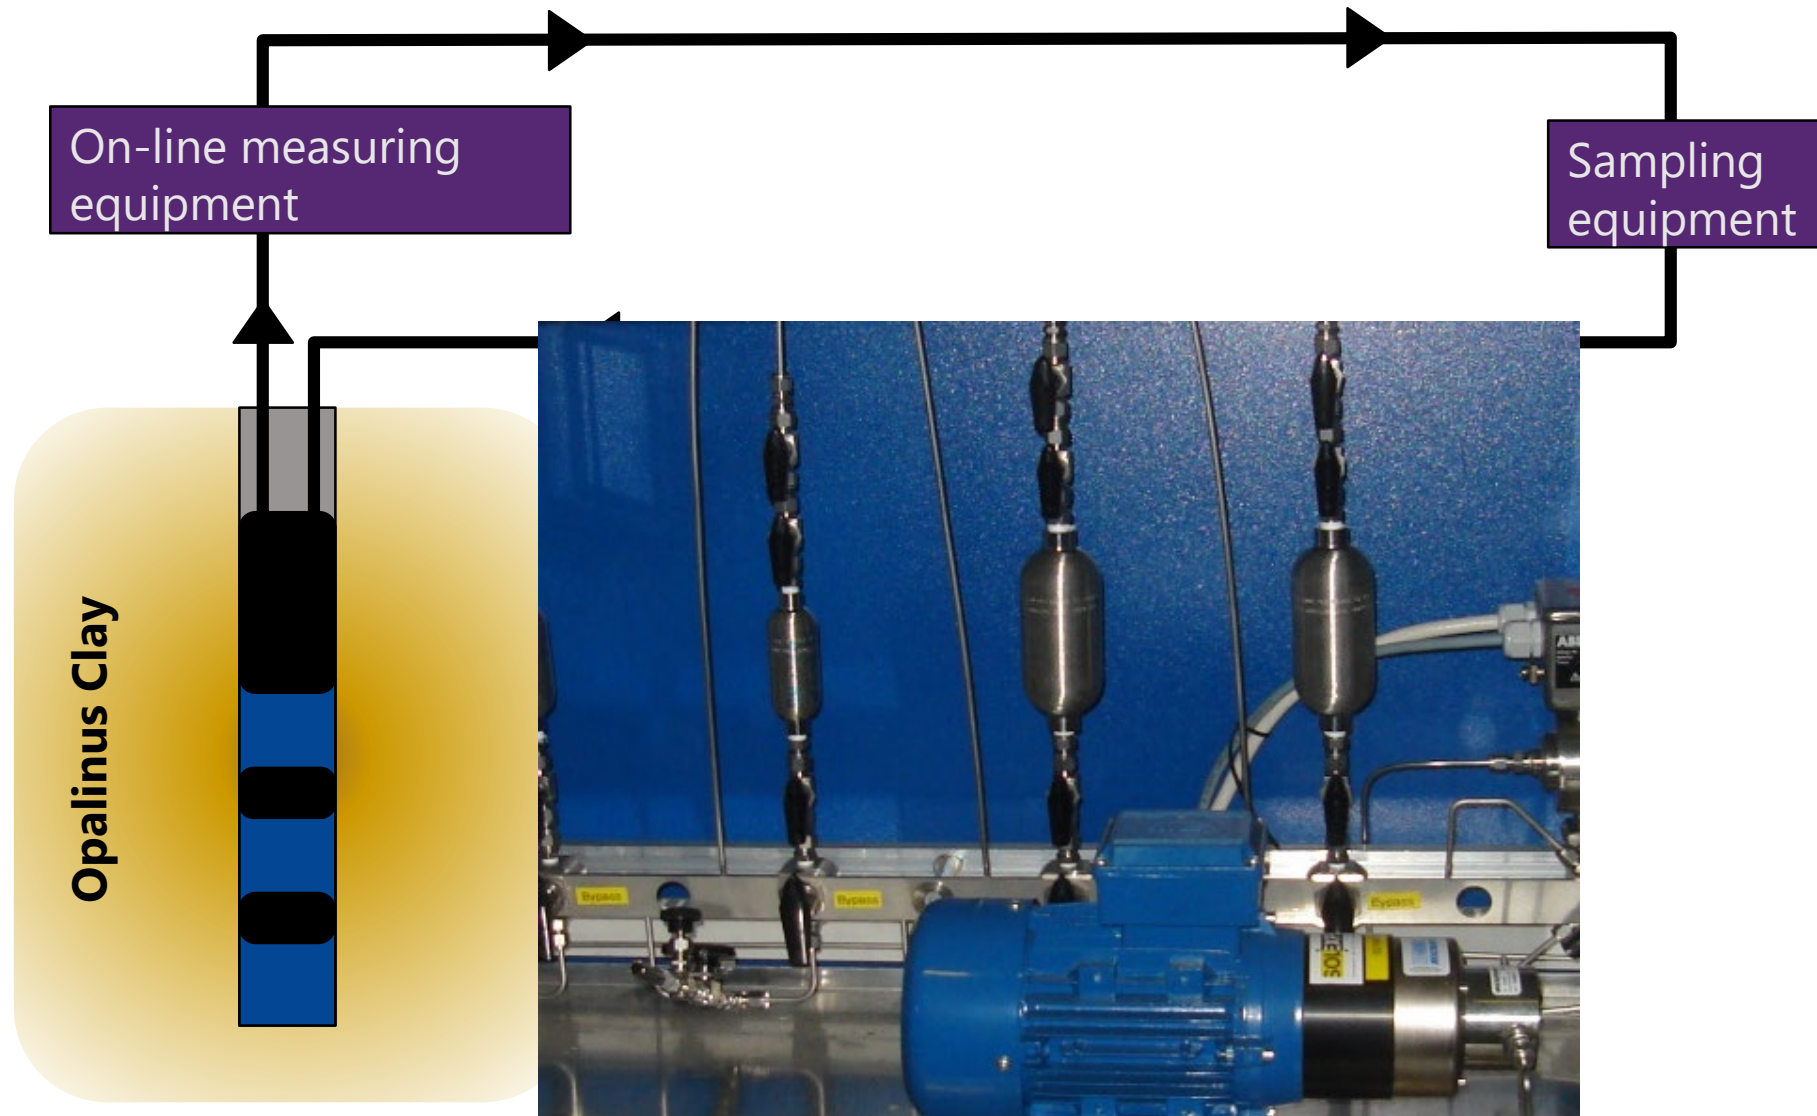



# Experimental setup of BN experiment

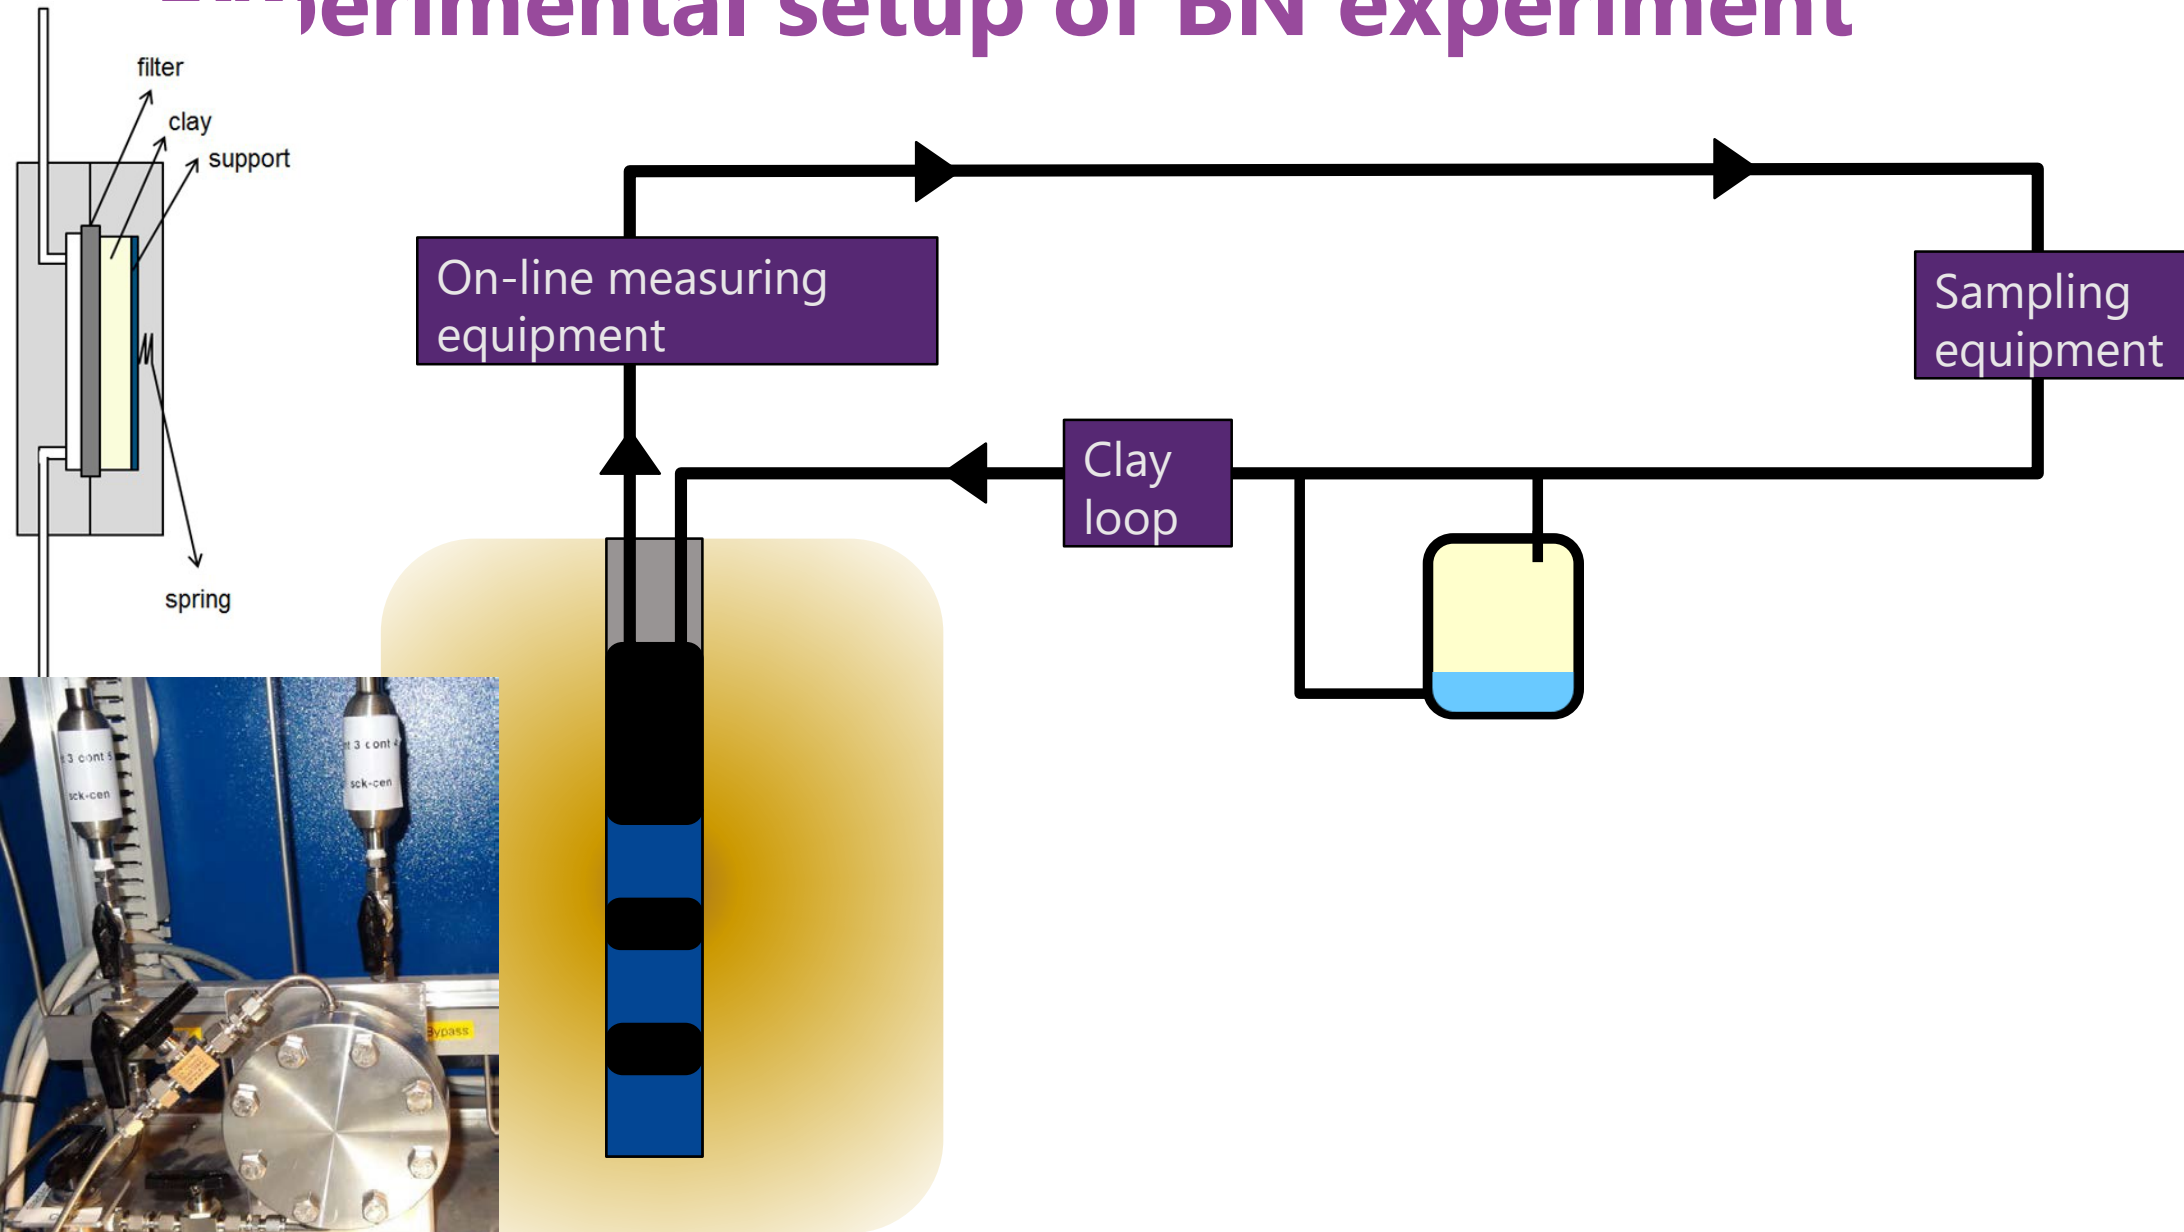

en et al. (2017)

# Experimental setup of BN experiment

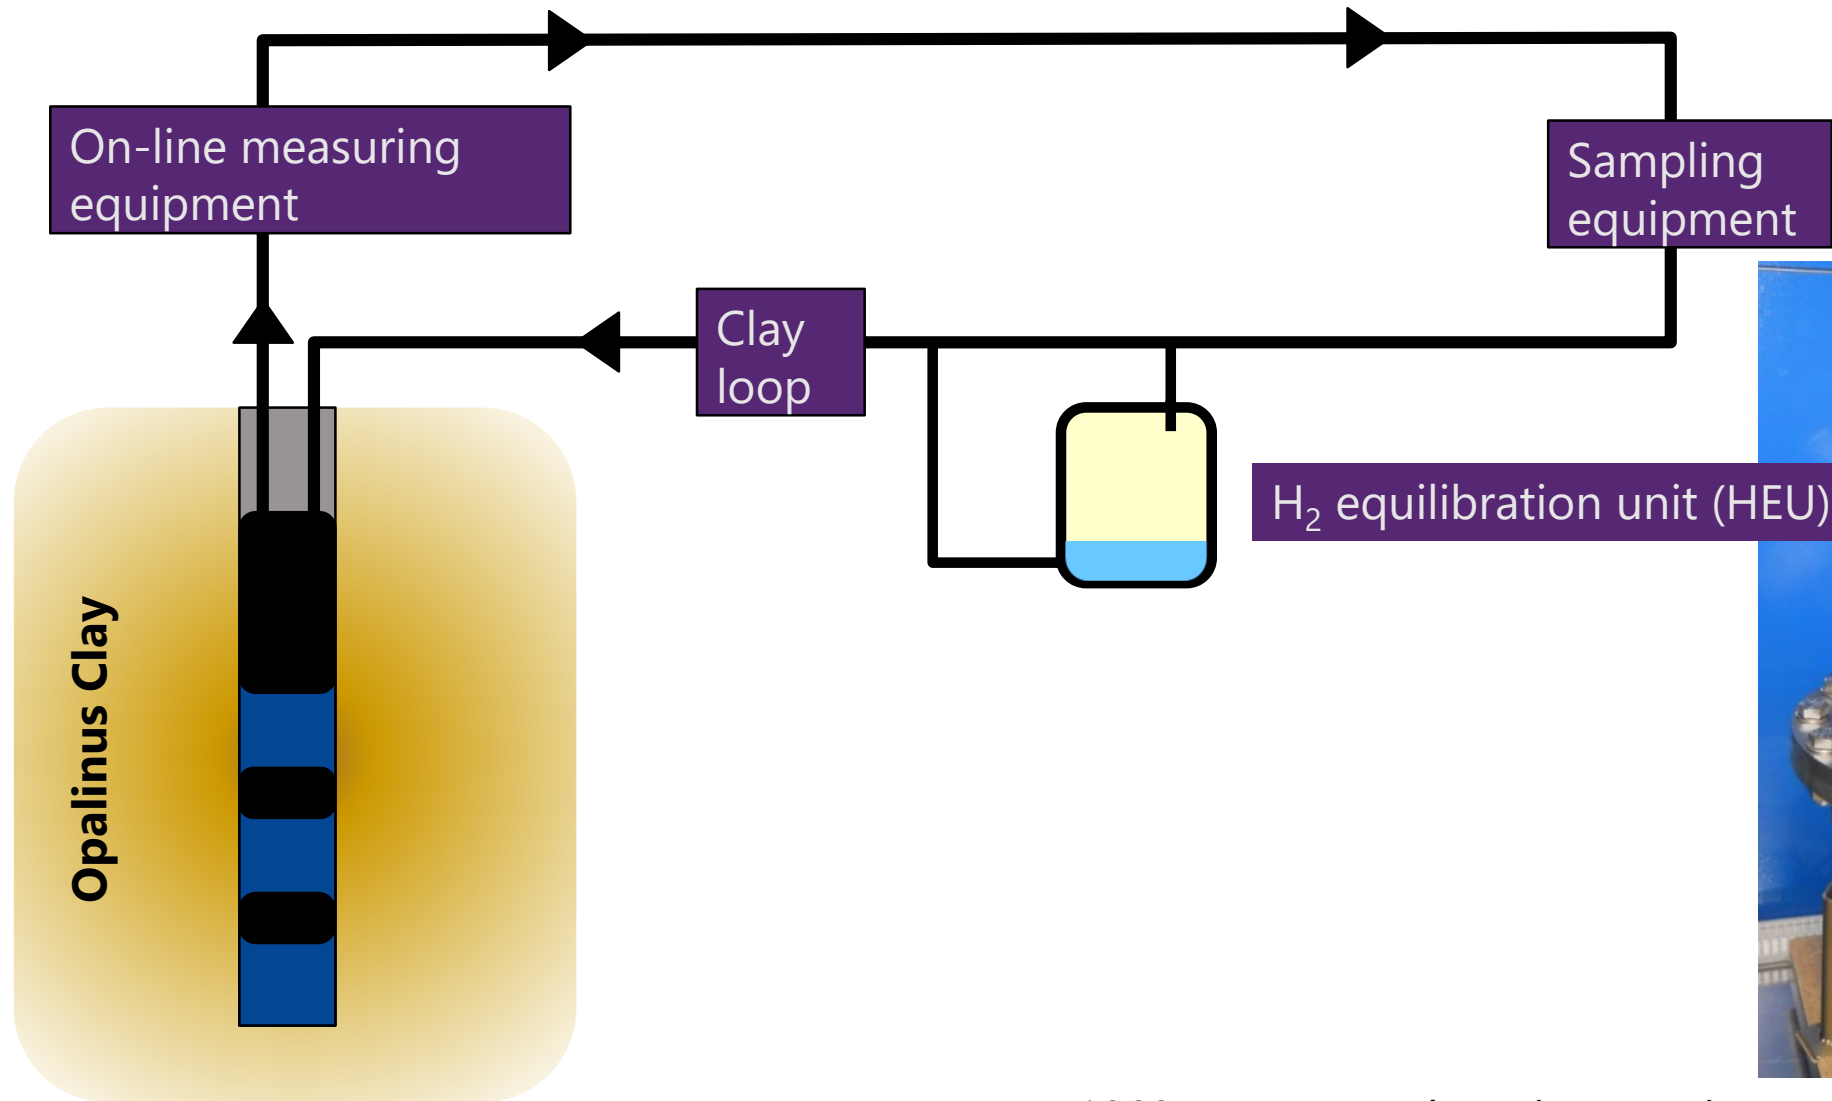

- ▶ 100% H<sub>2</sub> atmosphere in HEU (instead of Ar)
- ▶ max 1.6 to 2.3 mM dissolved H<sub>2</sub> in the solution

# Experimental setup of BN experiment

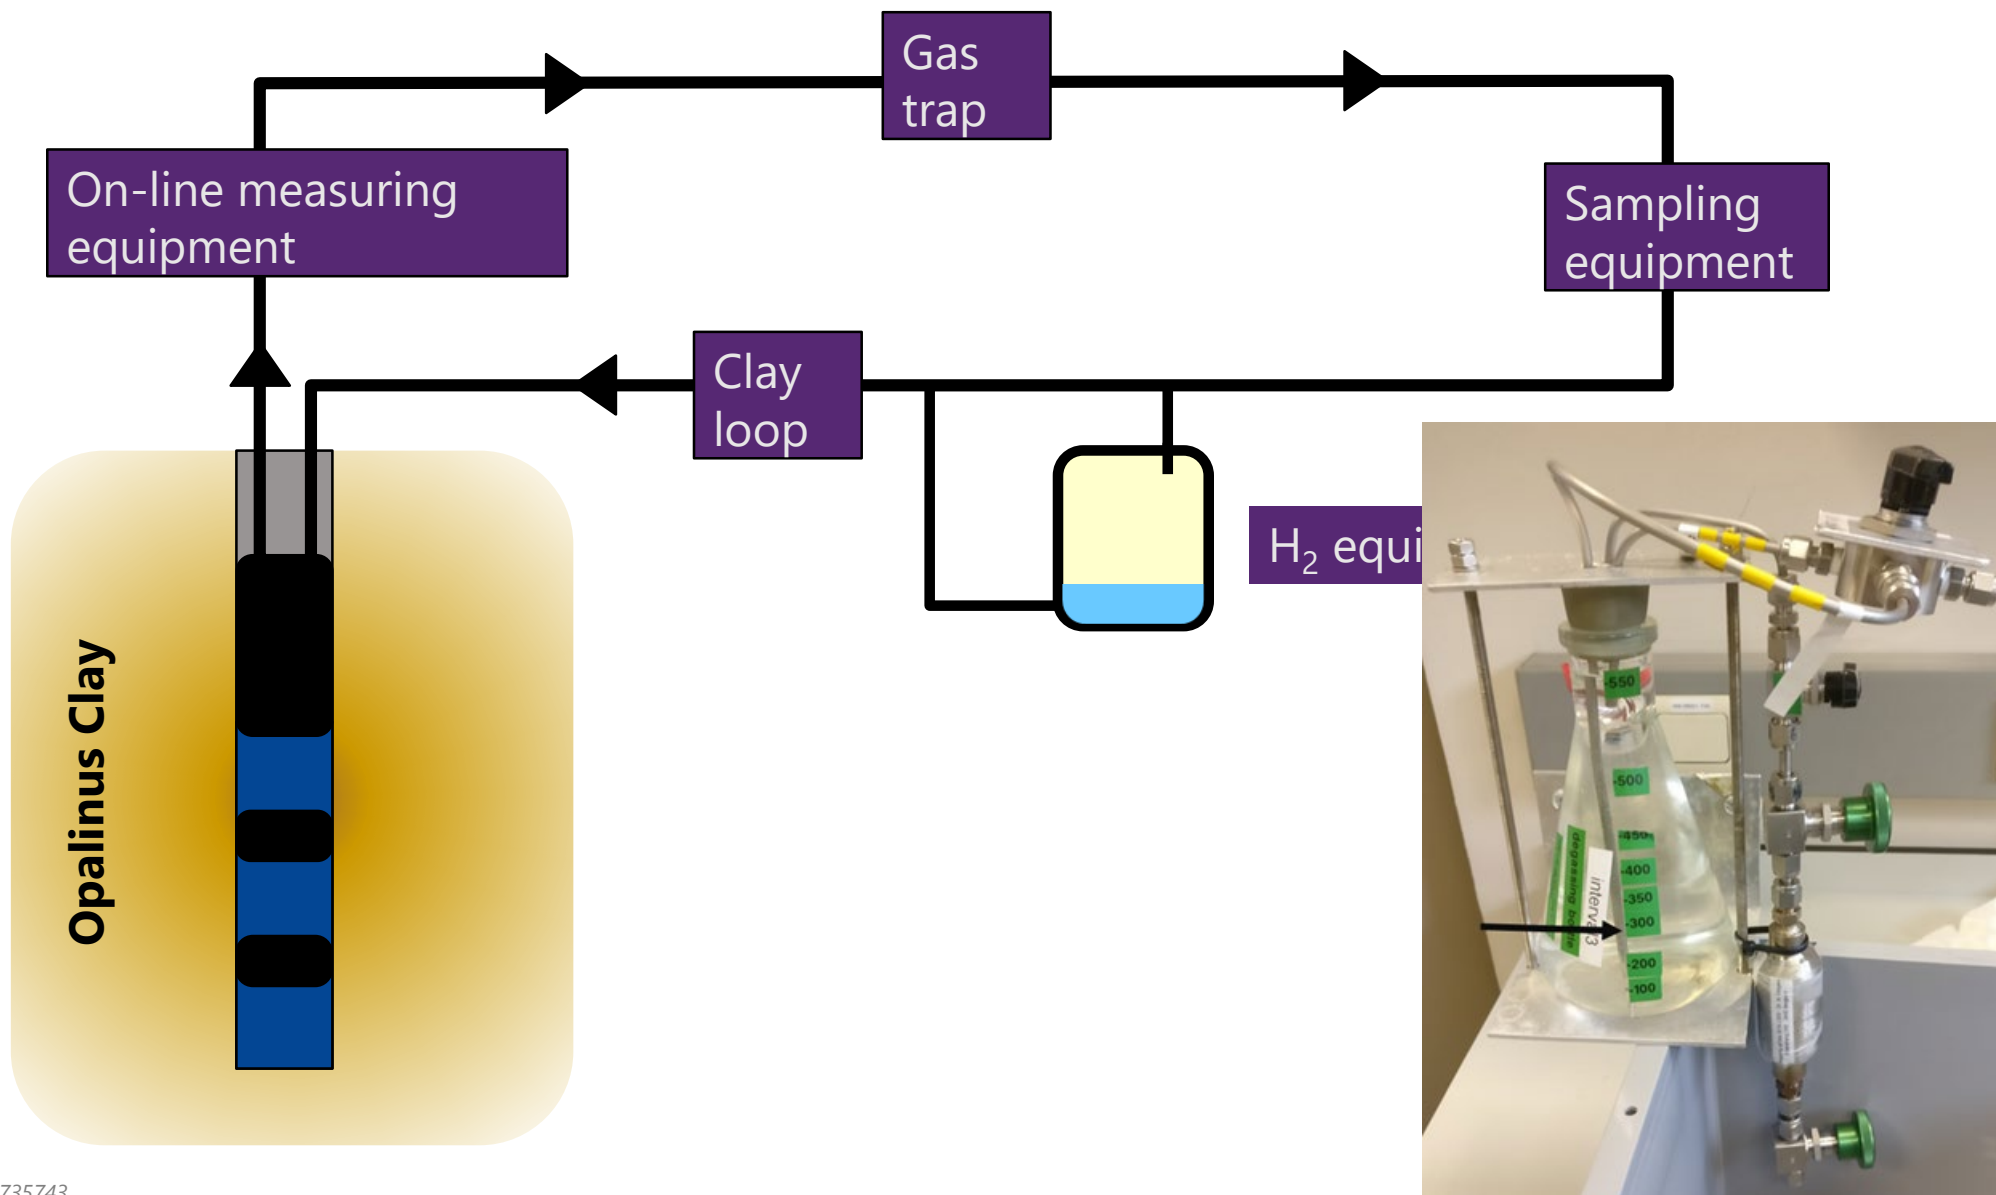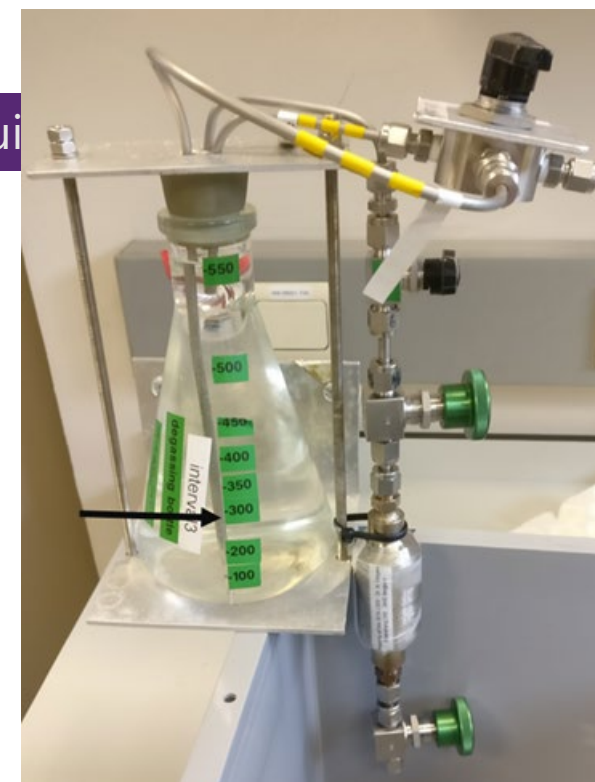

# Experimental setup of BN experiment

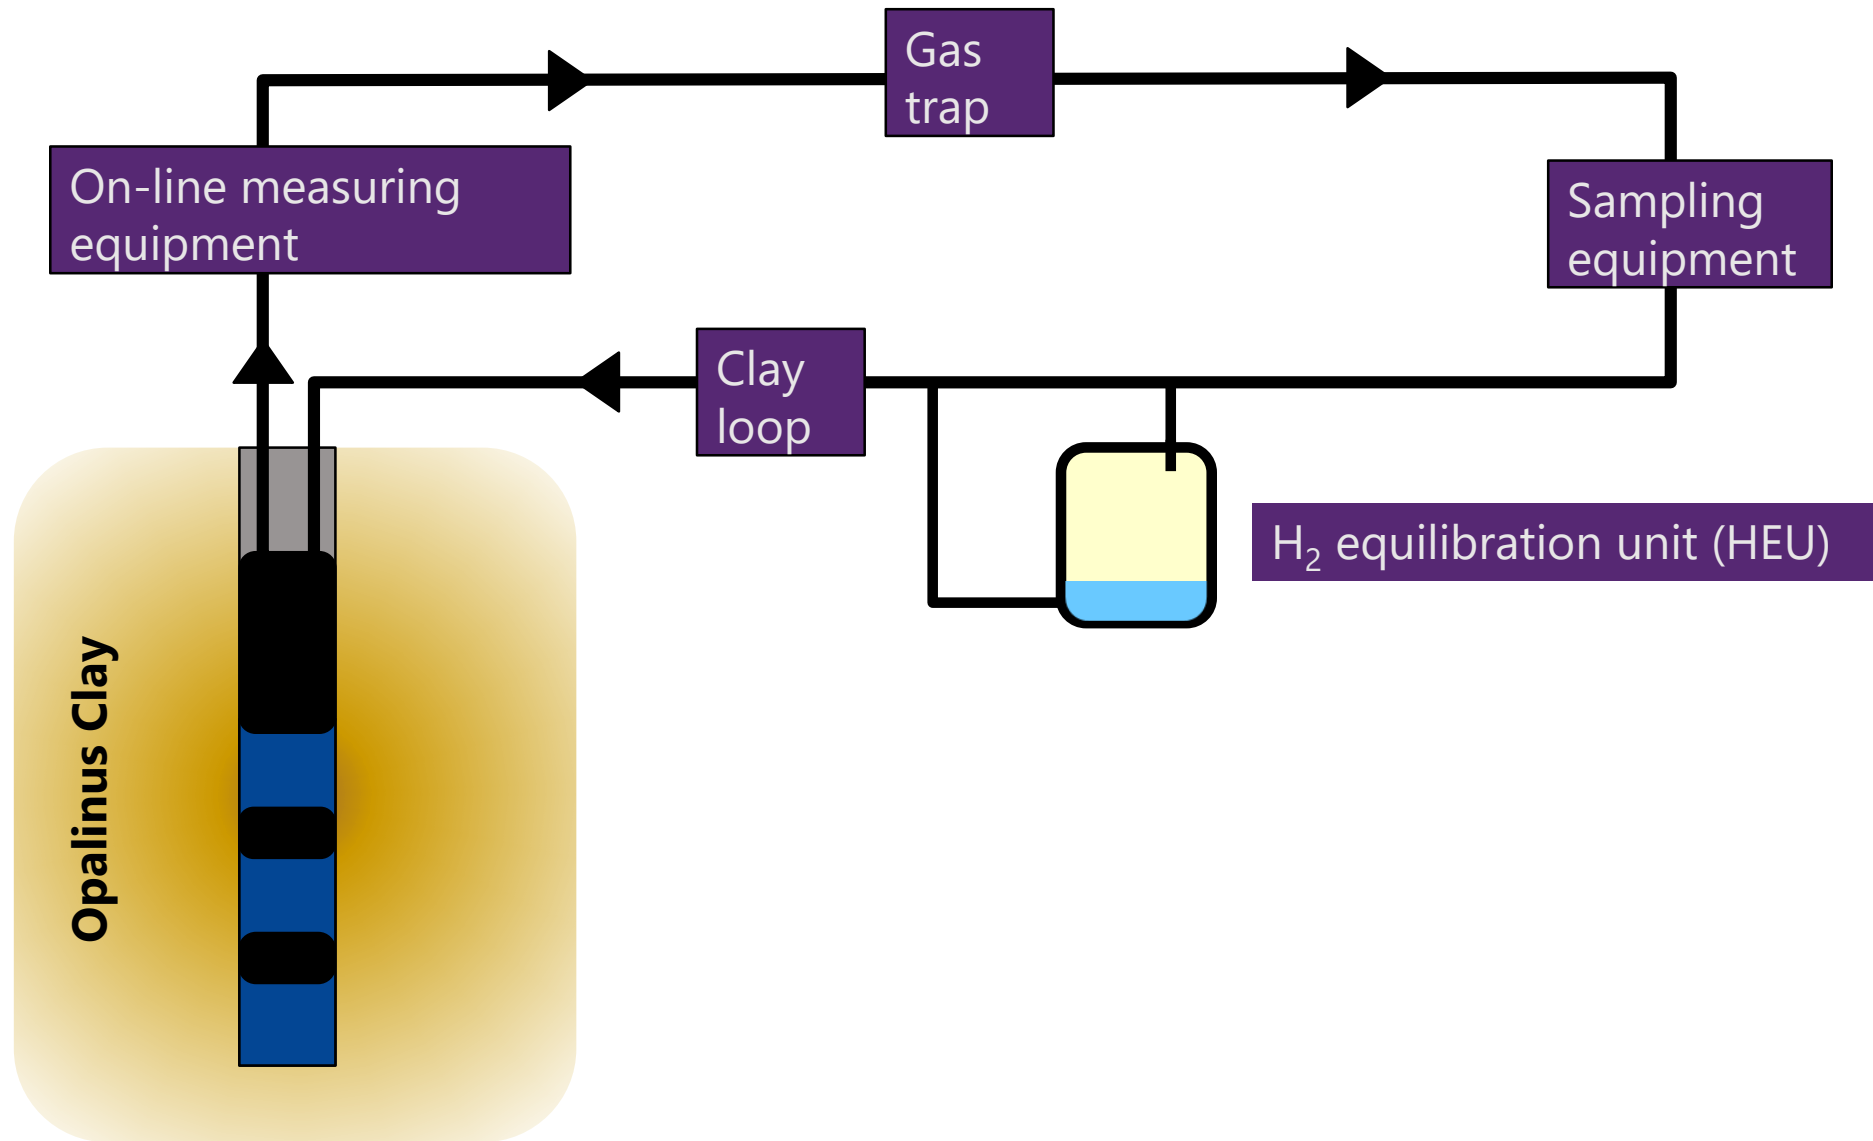

# Timeline of injections

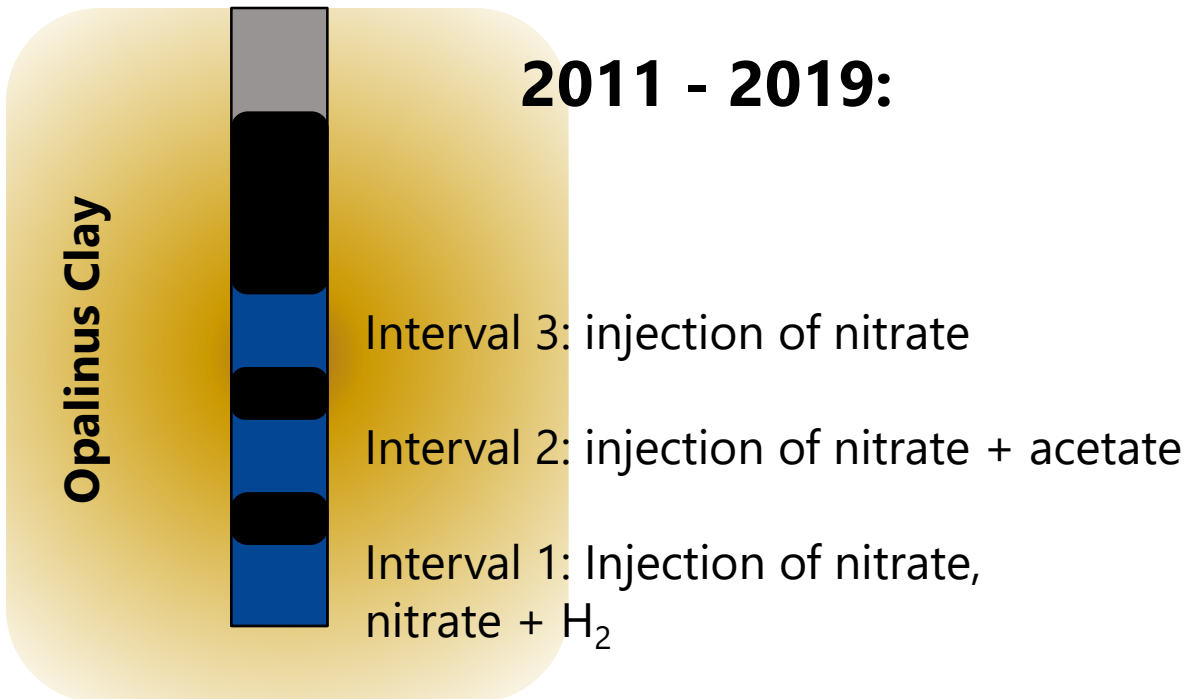

## 2019 – 2023:

- Interval 3: selenate, selenate + nitrate
- Interval 2: selenate (ongoing)
- Interval 1: selenate (ongoing)

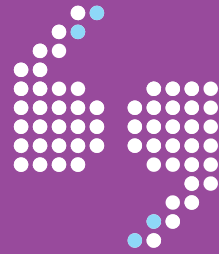

# Nitrate injection tests



# Nitrate reduction

- Slow nitrate decrease: mainly diffusion
- Very slow microbial nitrate reduction by clay electron donors: denitrification
- Shift in population towards denitrifiers that are organotrophs

*Brevundimonas*  
*Pseudomonas*

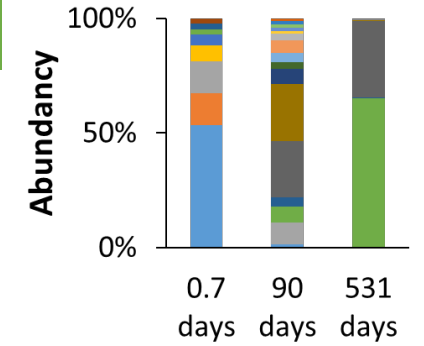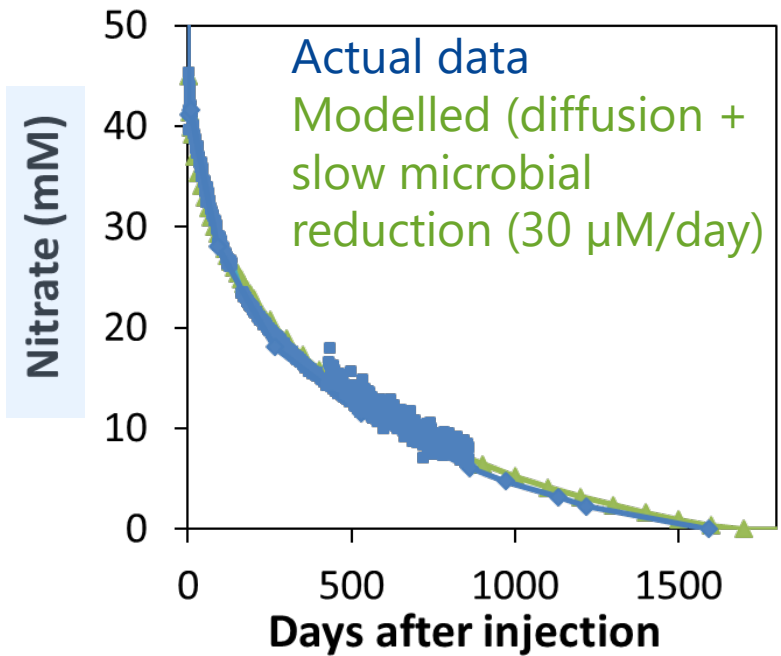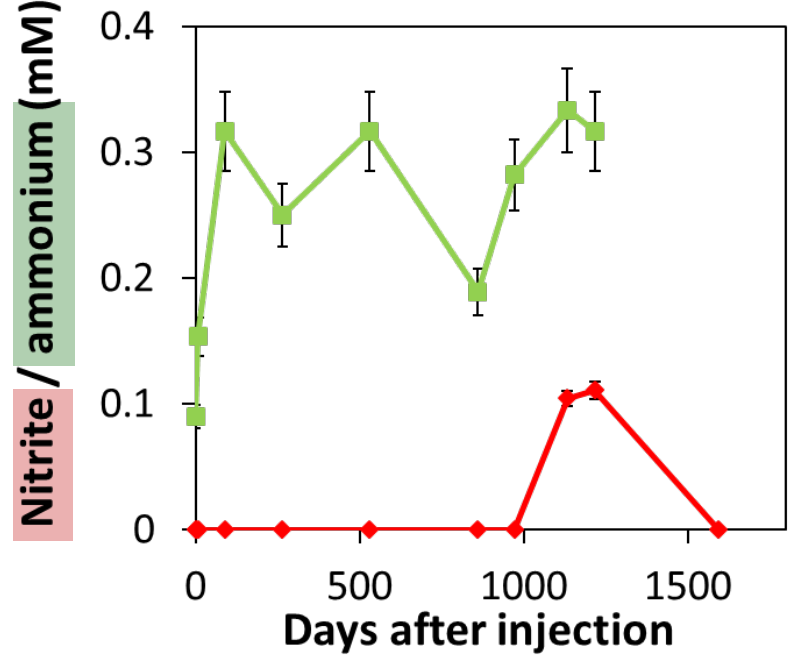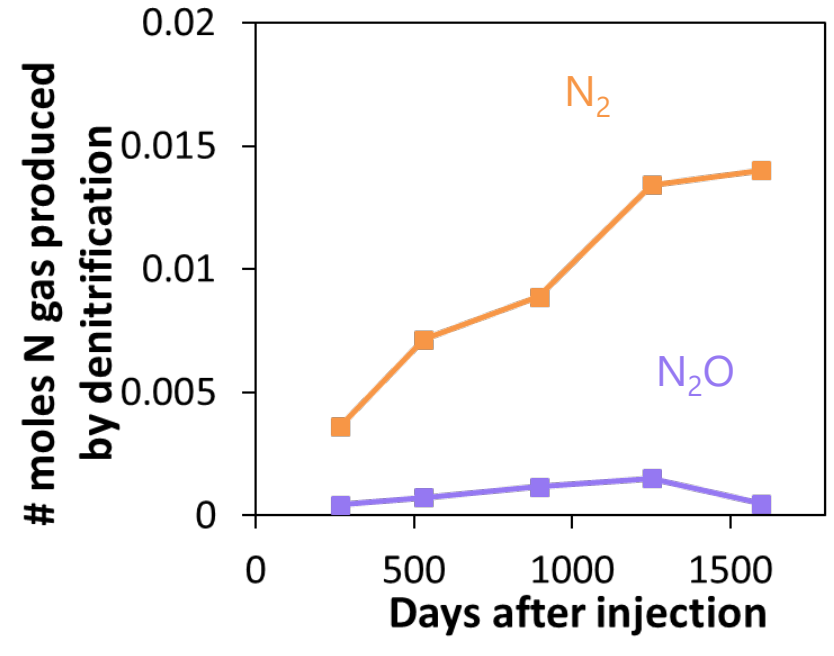

Possible  $e^-$  donors:

- Most likely: dissolved organic matter (DOM)
- Pyrite  $FeS_2$
- $Fe^{2+}$  containing minerals

# Nitrate reduction with acetate as external electron donor

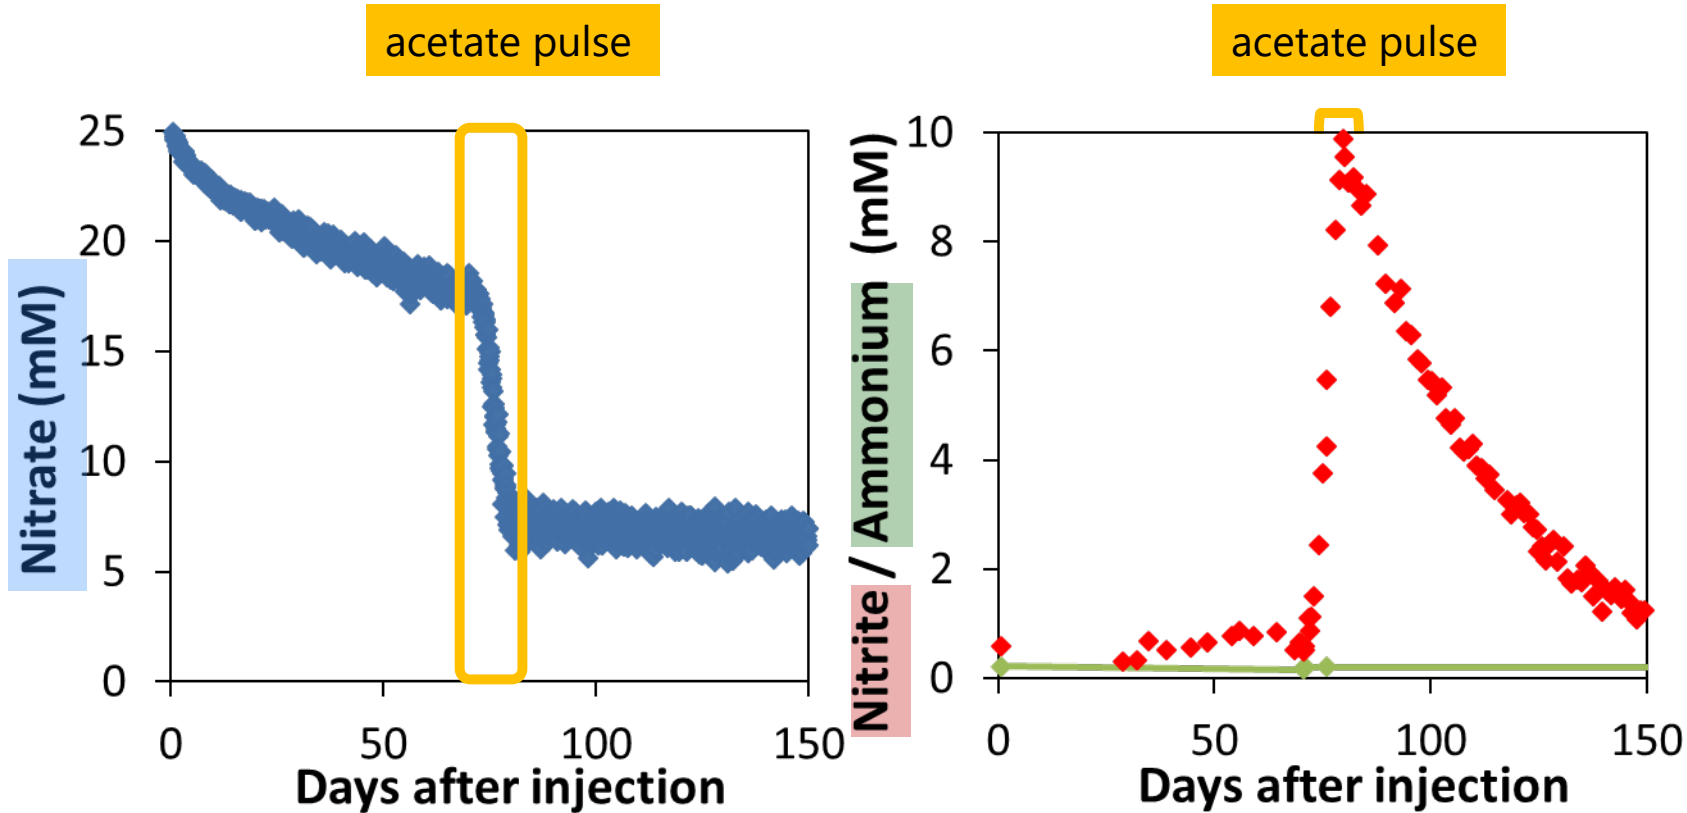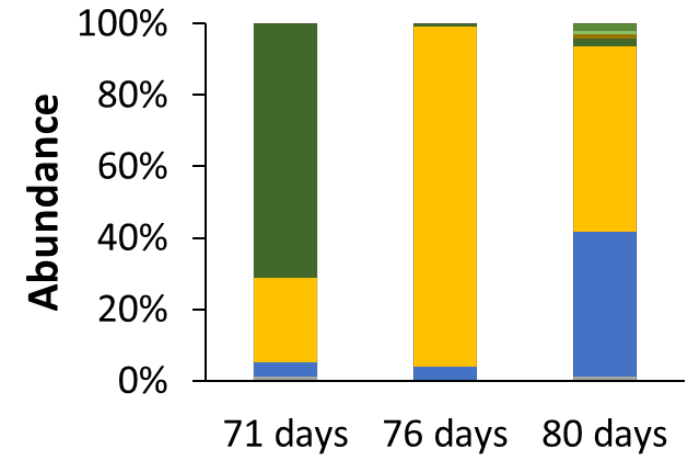

- 1-2 days lag phase
- Fast microbial nitrate reduction → mainly  $\text{NO}_2^-$  production with ~10% denitrification to  $\text{N}_2$

Shift towards 3 main genera  
*Phenylobacterium*: organotrophy  
*Pseudomonas*: organotrophic nitrate reducers  
*Acidovorax*: can use Fe(II), but also acetate as electron donor

# Nitrate reduction with H<sub>2</sub> as external electron donor

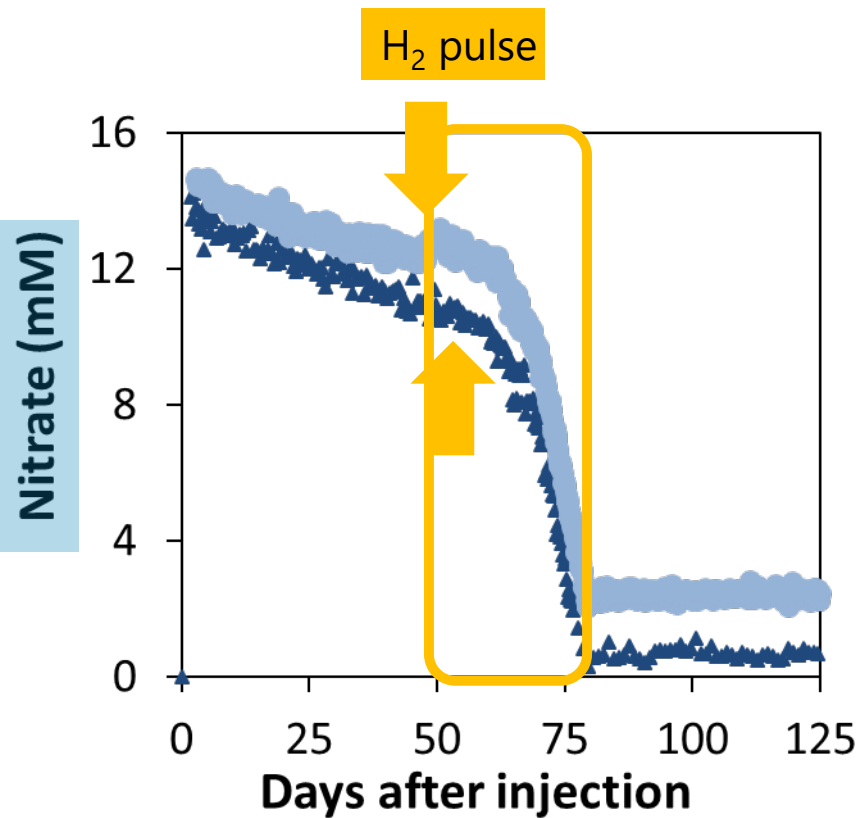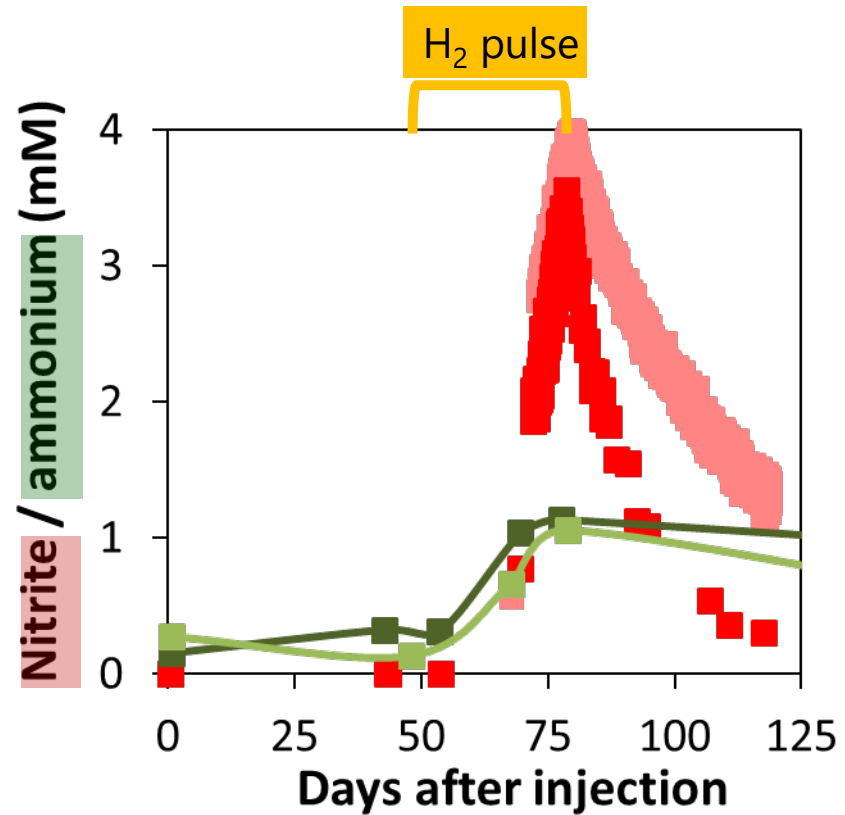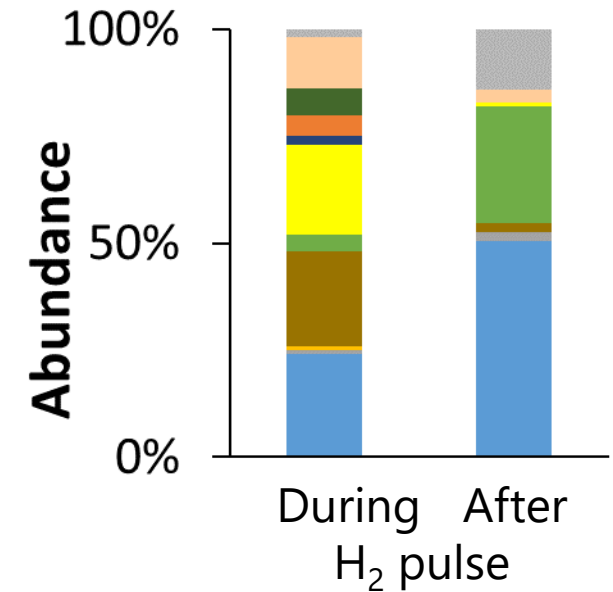

Hydrogenotrophs:

*Rhodocyclaceae*

Actinomycetales

*Clostridium*

*Acidovorax*

- 7-10 days lag phase
- Fast nitrate and  $pH_2 \downarrow$  due to reduction of  $NO_3^-$  by  $H_2 \rightarrow NO_2^-, NH_4^+, N_2$
- Production of ammonium can be biotic or abiotic (Fe surface-catalyzed)



# Selenate (+ nitrate) injection tests

60  $\mu$ M selenate

75  $\mu$ M selenate

75  $\mu$ M selenate + nitrate

120  $\mu$ M selenate + nitrate

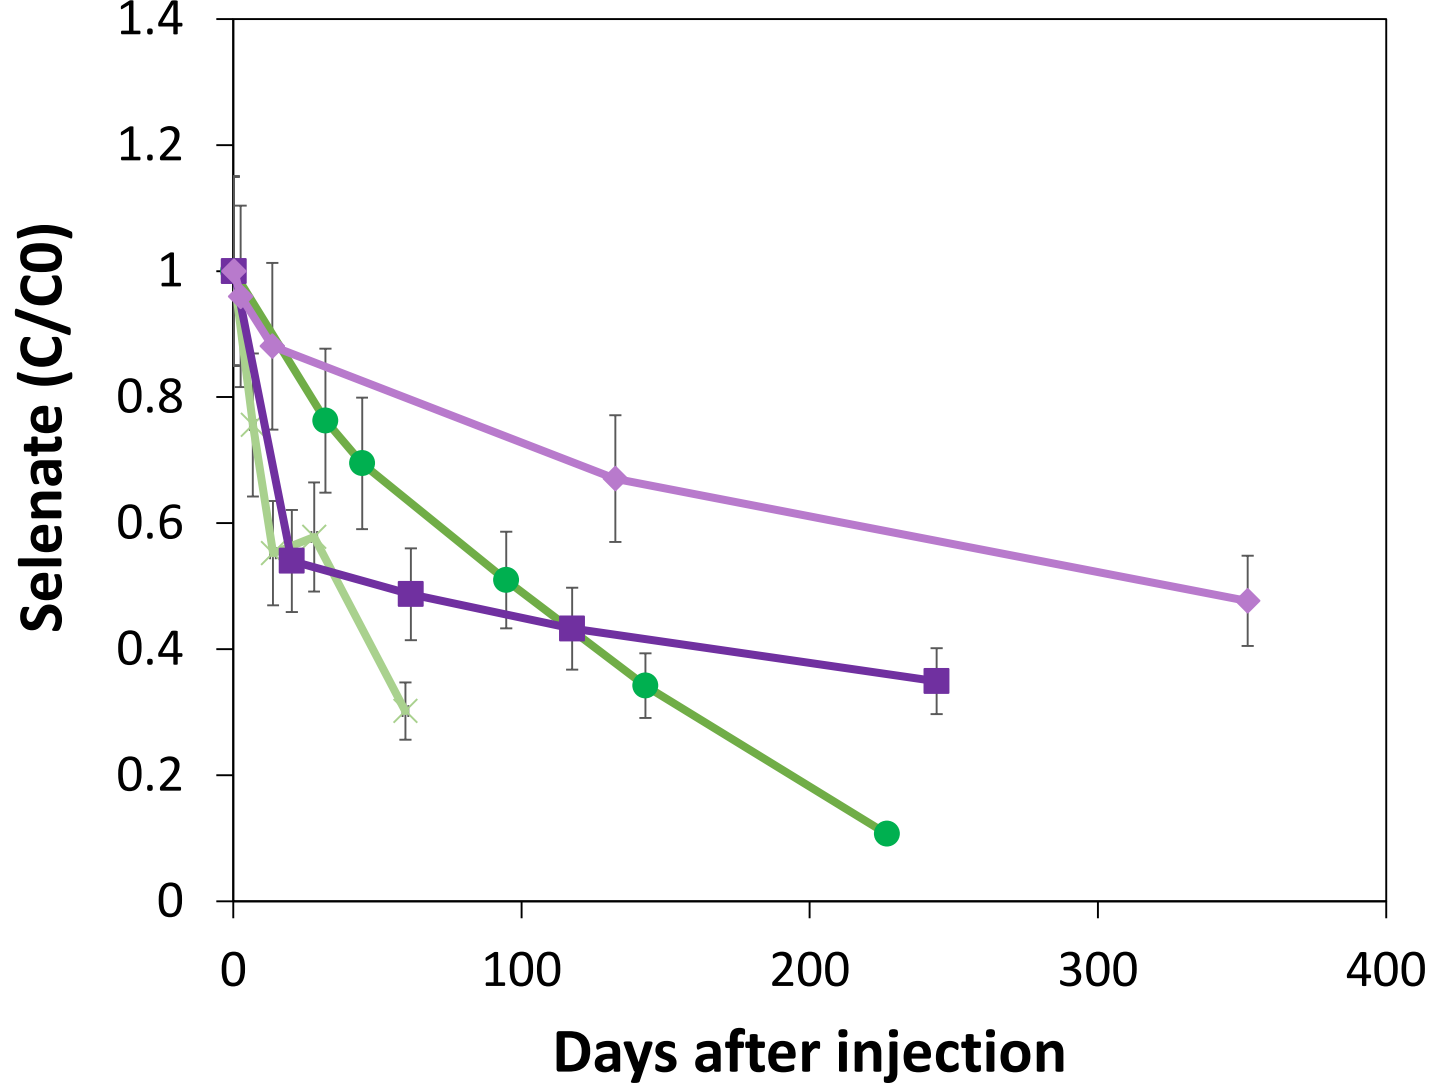

- Long-term: slower selenate removal rate in **presence** of nitrate, faster in **absence** of nitrate
- Nitrate suppressed the microbial reduction of selenate

# Fate of selenate in the BN borehole

Solid phase characterized by SEM-EDX and laser ablation coupled with QQQ-ICP-MS

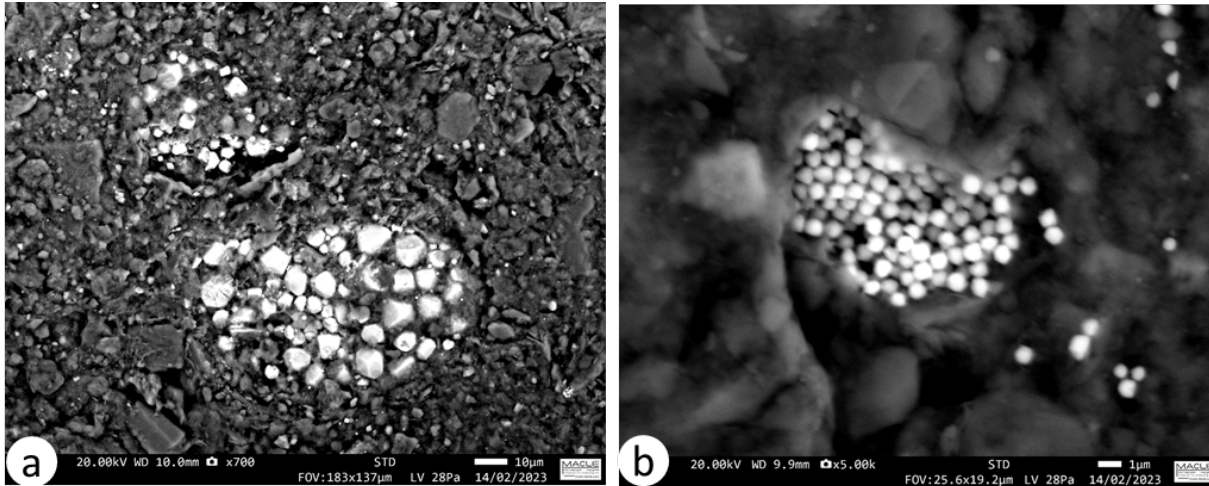

- Selenium was mostly found in pyrite and correlated with sulfur in the sample
- Likely reduced Se species on the solid phase

| depth in clay (µm) | 10  | 20  | 30 | 40 | 50 | 60 | 70 | 80 | 90 | 100 |
|--------------------|-----|-----|----|----|----|----|----|----|----|-----|
| average Se (ppm)   | 257 | 114 | 89 | 75 | 68 | 67 | 73 | 72 | 77 | 78  |
| stddev             | 149 | 57  | 40 | 24 | 25 | 19 | 34 | 25 | 32 | 29  |

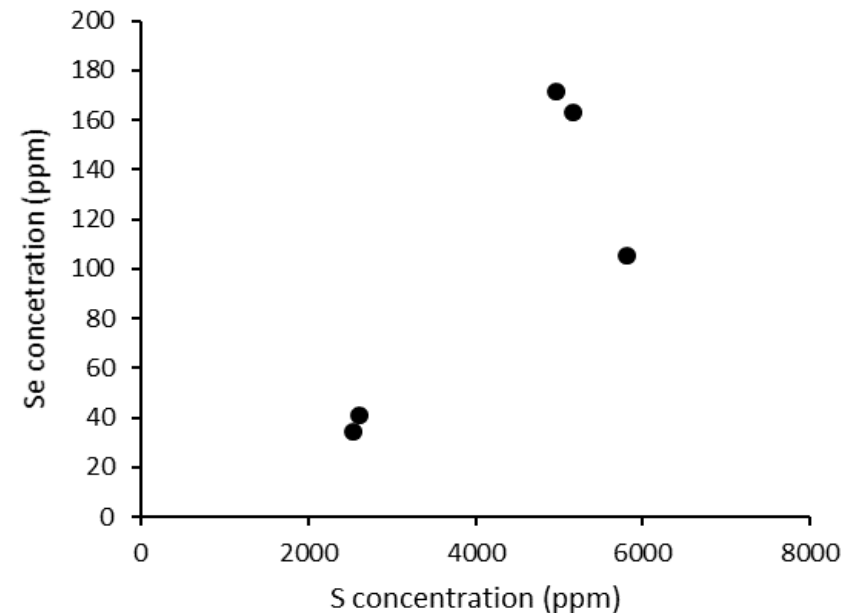





# BN experiment – what have we learned

# Conclusions: fate of nitrate

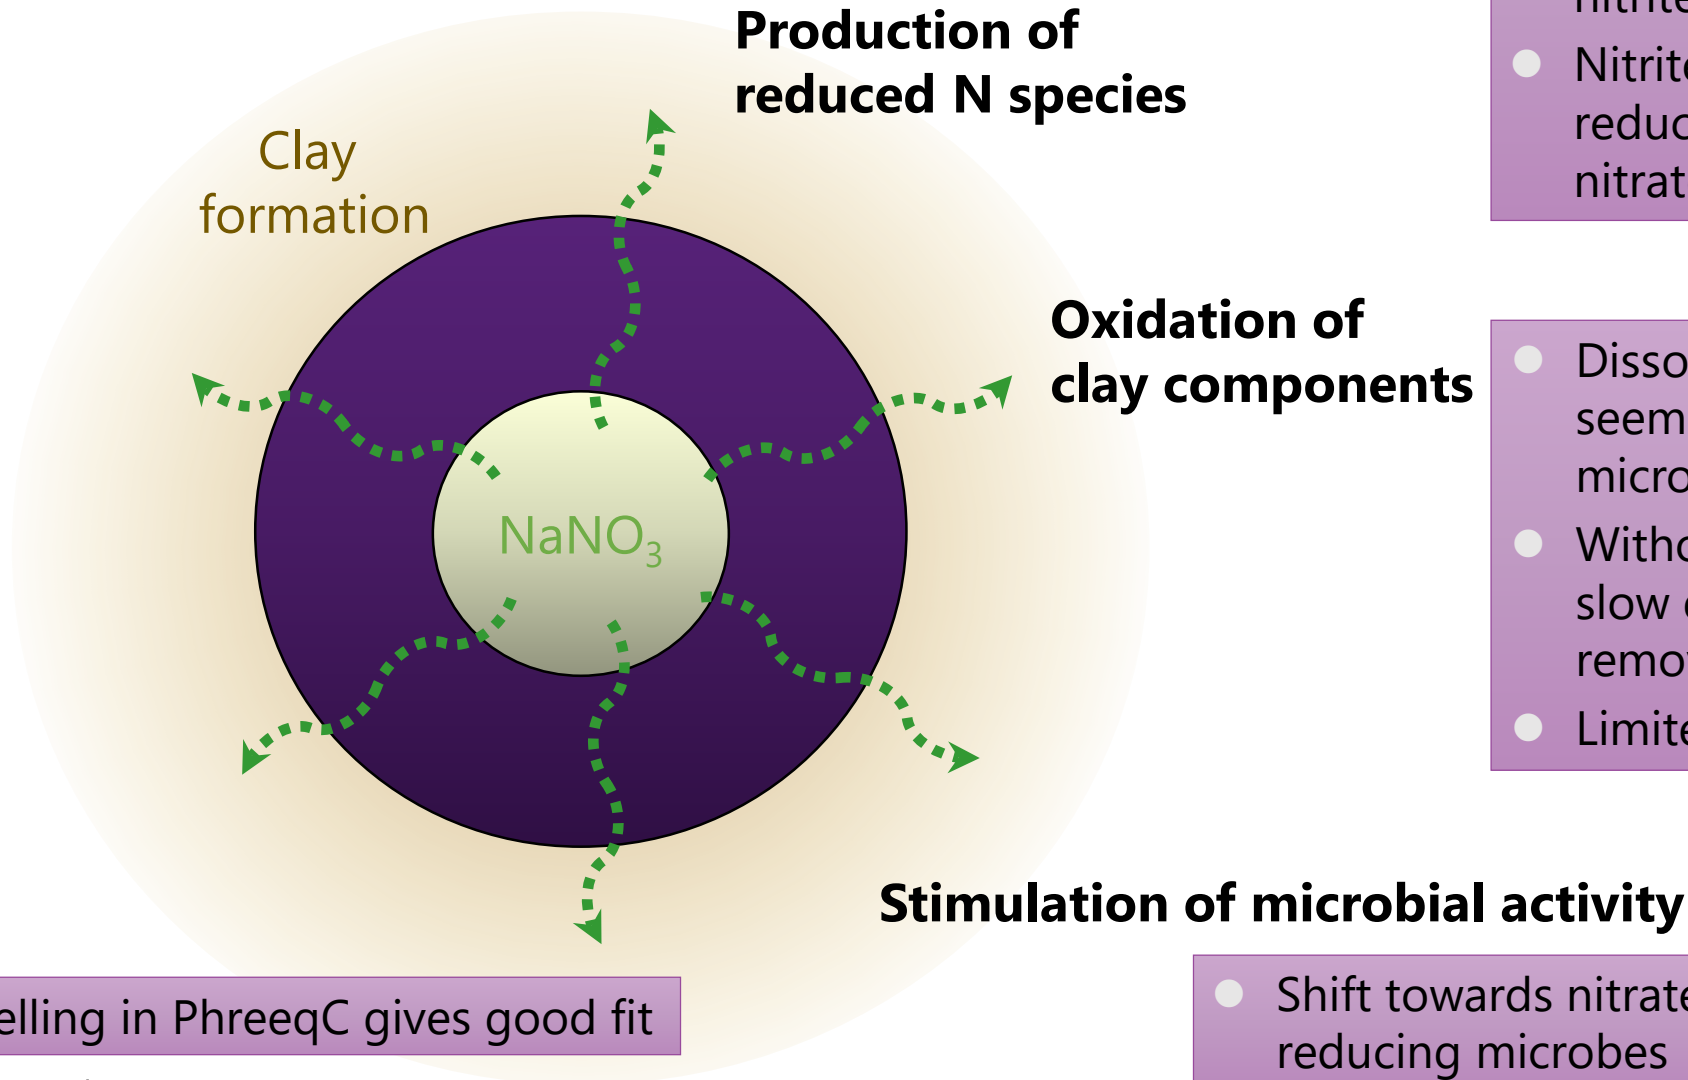

- Gaseous species  $\text{N}_2$  and  $\text{N}_2\text{O}$  observed
- With acetate /  $\text{H}_2$ : fast reaction to nitrite
- Nitrite is (microbially and abiotic) reduced, faster reduction than nitrate

- Dissolved organic matter in clay seems important  $\text{e}^-$  donor based on microbiology
- Without external electron donors: slow denitrification reaction, nitrate removal mainly by diffusion
- Limited oxidation of clay minerals

- Shift towards nitrate reducing microbes

Modelling in PhreeqC gives good fit

# Conclusions: fate of selenate

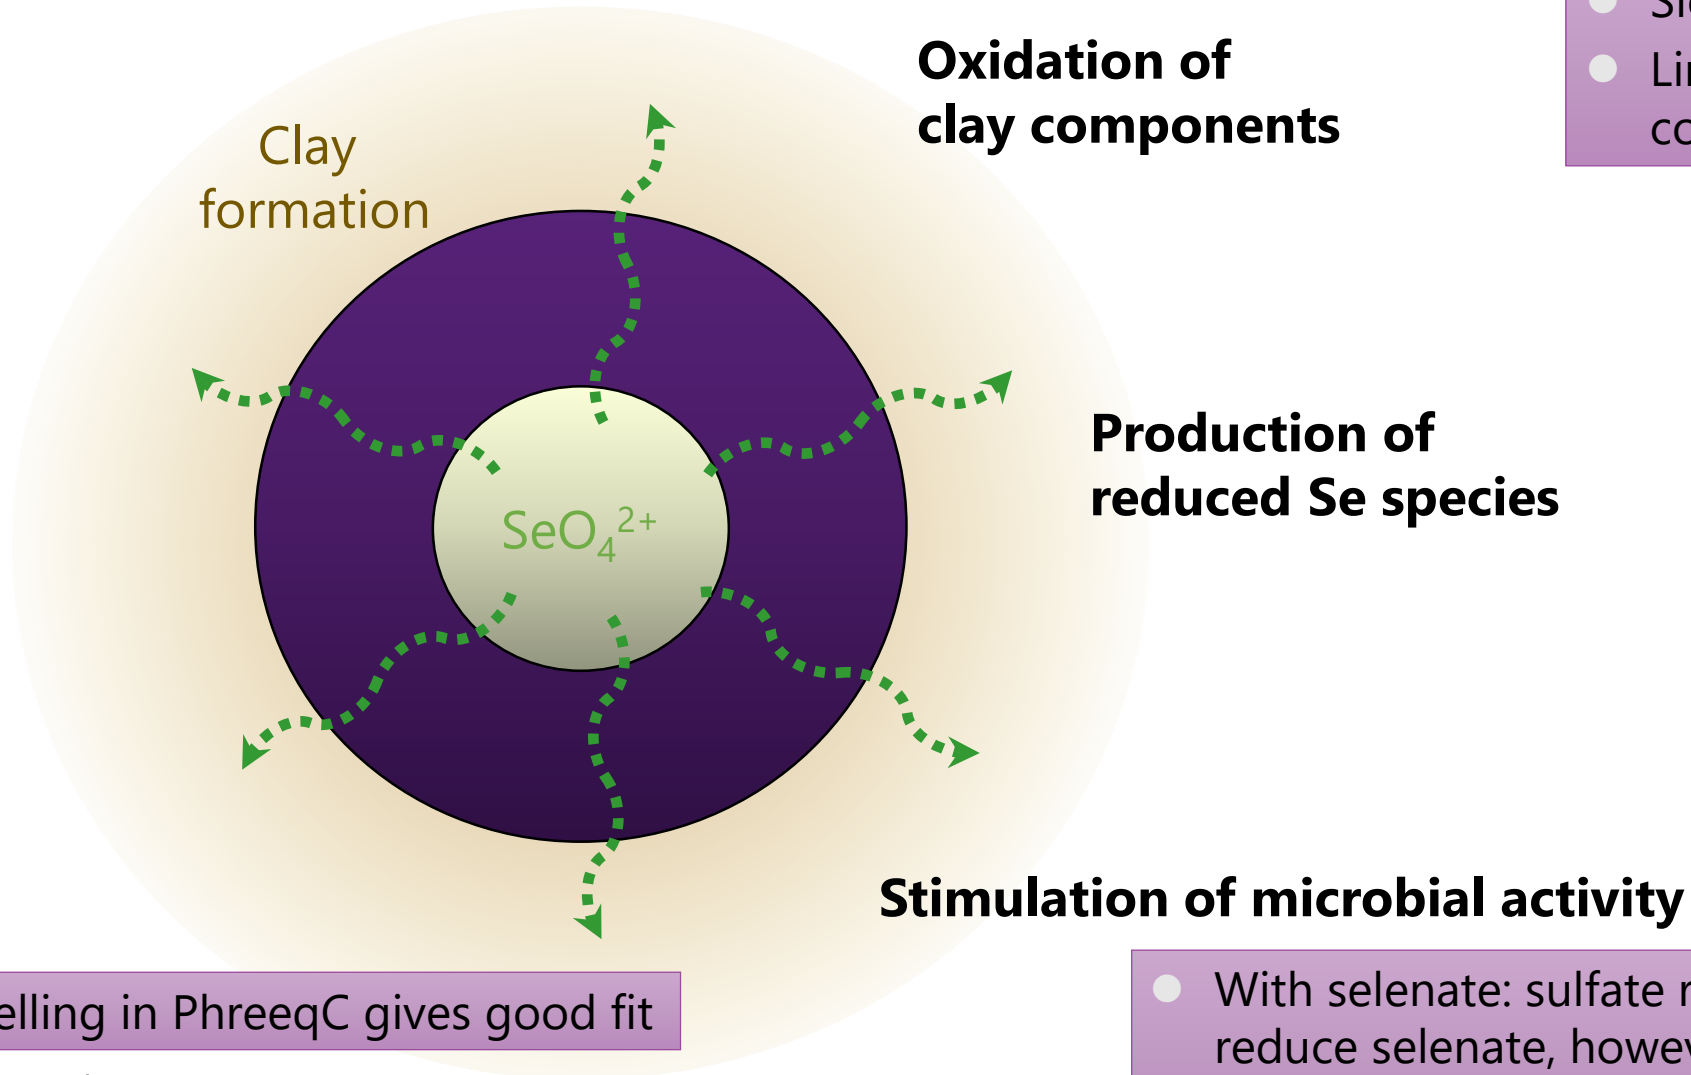

- Slow microbial reaction
- Limited oxidation of clay components expected

- Selenite is formed to some extent
- Selenium species are found on the solid phase, associated with pyrite

Modelling in PhreeqC gives good fit

- With selenate: sulfate reducing microbes can also reduce selenate, however slowly
- Once nitrate is introduced: shift back to denitrifiers

# Further reading

- Bleyen, N., Smets, S., Small, J. *et al.* (2017) Impact of the electron donor on in situ microbial nitrate reduction in Opalinus Clay: results from the Mont Terri rock laboratory (Switzerland). *Swiss Journal of Geosciences*
- Nussbaum, C., Bernier, F., Bleyen, N., *et al.* (2023). 25 years of cross-fertilization between HADES and Mont Terri rock laboratory. *Geological Society, London, Special Publications*
- Bleyen, N., Smets, S., Small, J., *et al.* (2018). Impact of the electron donor on in situ microbial nitrate reduction in Opalinus Clay: results from the Mont Terri rock laboratory (Switzerland). *Mont Terri Rock Laboratory, 20 Years: Two Decades of Research and Experimentation on Claystones for Geological Disposal of Radioactive Waste*
- Bleyen, N., Small, J. S., Mijndonckx, K., *et. al.* (2021). Ex and in situ reactivity and sorption of selenium in Opalinus clay in the presence of a selenium reducing microbial community. *Minerals*
- Bleyen N., Albrecht A., De Cannière P., *et.al.* (2019). Non-destructive on-line and long-term monitoring of in situ nitrate and nitrite reactivity in a clay environment at increasing turbidity. *Applied Geochemistry*

## Copyright © SCK CEN

### PLEASE NOTE!

This presentation contains data, information and formats for dedicated use only and may not be communicated, copied, reproduced, distributed or cited without the explicit written permission of SCK CEN.

If this explicit written permission has been obtained, please reference the author, followed by 'by courtesy of SCK CEN'.

Any infringement to this rule is illegal and entitles to claim damages from the infringer, without prejudice to any other right in case of granting a patent or registration in the field of intellectual property.

### **SCK CEN**

Belgian Nuclear Research Centre

Foundation of Public Utility

Registered Office: Avenue Herrmann-Debrouxlaan 40 – BE-1160 BRUSSELS

Operational Office: Boeretang 200 – BE-2400 MOL
